# Supplementary material for: Tandem Payne/Meinwald versus Meinwald rearrangements on the α-hydroxy- or α-silyloxy-spiro epoxide skeleton
Source: Royal Society of Chemistry journal article supplement (doi:10.1039/c1ob06776a), 2011-11-17

# **Tandem Payne/Meinwald versus Meinwald rearrangement on the $\alpha$ -hydroxy- or $\alpha$ -silyloxy-spiro epoxide skeleton**

## **ELECTRONIC SUPPLEMENTARY INFORMATION (ESI)**

*Jane Totobenazara, Heloua Haroun, Julien Rémond, Karim Adil, Fabrice Dénès,  
Jacques Lebreton, Catherine Gaulon-Nourry,\* and Pascal Gosselin\**

*Unité de Chimie Organique Moléculaire and Macromoléculaire (CNRS UMR 6011),  
Faculté des Sciences, avenue Olivier Messiaen, 72085 Le Mans Cedex 9, France,  
and Laboratoire des Oxydes et Fluorures (CNRS UMR 6010), Faculté des Sciences,  
avenue Olivier Messiaen, 72085 Le Mans Cedex 9, France and CEISAM (CNRS  
UMR 6230), Université de Nantes, 2 rue de la Houssinière BP 92208, 44322 Nantes  
Cedex 3, France*

[catherine.gaulon@univ-lemans.fr](mailto:catherine.gaulon@univ-lemans.fr), [pascal.gosselin@univ-lemans.fr](mailto:pascal.gosselin@univ-lemans.fr)

## Table of contents

|                                                                                                                                                                                 |    |
|---------------------------------------------------------------------------------------------------------------------------------------------------------------------------------|----|
| <b>A. Materials and Methods</b> .....                                                                                                                                           | 3  |
| <b>B. Synthesis of <math>\alpha</math>-hydroxy spiroepoxides (1a) and (1b)</b> .....                                                                                            | 3  |
| ( $\pm$ ) 4-[( <i>tert</i> -butyldimethylsilyl)oxy]-2,6,6-trimethylcyclohex-2-en-1-one .....                                                                                    | 3  |
| ( $\pm$ ) (1 <i>S</i> , 5 <i>R</i> , 6 <i>S</i> )-5-[( <i>tert</i> -butyldimethylsilyl)oxy]-1,3,3-trimethyl-7-oxabicyclo[4.1.0]hepta-2-one<br><b>(3)</b> .....                  | 4  |
| ( $\pm$ ) (1 <i>S</i> , 5 <i>R</i> , 6 <i>S</i> )-5-hydroxy-1,3,3-trimethyl-7-oxabicyclo[4.1.0]hepta-2-one.....                                                                 | 5  |
| ( $\pm$ ) (1 <i>S</i> , 2 <i>S</i> , 4 <i>R</i> )-2,6,6-trimethylcyclohexane-1,2,4-triol <b>(4)</b> .....                                                                       | 5  |
| ( $\pm$ ) (1 <i>S</i> , 2 <i>S</i> , 5 <i>R</i> )-5-[( <i>tert</i> -butyldimethylsilyl)oxy]-1,3,3-trimethylcyclohexane-1,2-diol .....                                           | 6  |
| ( $\pm$ ) (2 <i>R</i> ,4 <i>S</i> )-4-[( <i>tert</i> -butyldimethylsilyl)oxy]-2-hydroxy-2,6,6-trimethylcyclohexanone <b>(5)</b> .....                                           | 7  |
| Access to $\alpha$ -hydroxyepoxides <b>(1a)</b> and <b>(1b)</b> from ketone <b>(5)</b> .....                                                                                    | 7  |
| <i>Epoxidation protocol using trimethylsulfoxonium ylide</i> .....                                                                                                              | 7  |
| <i>Epoxidation protocol using trimethylsulfonium ylide</i> .....                                                                                                                | 8  |
| ( $\pm$ ) (3 <i>R</i> , 4 <i>S</i> , 6 <i>R</i> ) 6-[( <i>tert</i> -butyldimethylsilyl)oxy]-4,8,8-trimethyl-1-oxaspiro[2.5]octan-4-ol <b>(1a)</b> .....                         | 8  |
| ( $\pm$ ) (3 <i>S</i> , 4 <i>S</i> , 6 <i>R</i> ) 6-[( <i>tert</i> -butyldimethylsilyl)oxy]-4,8,8-trimethyl-1-oxaspiro[2.5]octan-4-ol <b>(1b)</b> .....                         | 8  |
| <b>C. Synthesis of <math>\alpha</math>-silyloxy spiroepoxides (2a) and (2b)</b> .....                                                                                           | 9  |
| ( $\pm$ ) (3 <i>R</i> , 4 <i>S</i> , 6 <i>R</i> ) 6-[( <i>tert</i> -butyldimethylsilyl)oxy]-4-[(trimethylsilyl)oxy]-4,8,8-trimethyl-1-<br>oxaspiro[2.5]octane <b>(2a)</b> ..... | 9  |
| ( $\pm$ ) (3 <i>S</i> , 4 <i>S</i> , 6 <i>R</i> ) 6-[( <i>tert</i> -butyldimethylsilyl)oxy]-4-[(trimethylsilyl)oxy]-4,8,8-trimethyl-1-<br>oxaspiro[2.5]octane <b>(2b)</b> ..... | 10 |
| <b>D. Acid-induced rearrangements protocols on compounds (1) and (2)</b> .....                                                                                                  | 10 |
| SnCl <sub>4</sub> and BF <sub>3</sub> ·OEt <sub>2</sub> protocol .....                                                                                                          | 10 |
| Yb(OTf) <sub>3</sub> protocol .....                                                                                                                                             | 10 |
| MABR protocol .....                                                                                                                                                             | 11 |
| B(C <sub>6</sub> F <sub>5</sub> ) <sub>3</sub> protocol .....                                                                                                                   | 11 |
| <i>t</i> -BuMe <sub>2</sub> SiOTf/ <i>i</i> -Pr <sub>2</sub> NEt protocol on substrate 1 (Jung's protocol) .....                                                                | 11 |
| Me <sub>3</sub> SiOTf/ <i>i</i> -Pr <sub>2</sub> NEt protocol on substrate 2 (Jung's protocol) .....                                                                            | 12 |
| ( $\pm$ ) 1-((1 <i>S</i> , 4 <i>R</i> )-4-(( <i>tert</i> -butyldimethylsilyl)oxy)-1,2,2-trimethylcyclopentyl)-2-hydroxyethanone<br><b>(6)</b> .....                             | 12 |
| ( $\pm$ ) 2-((1 <i>S</i> , 4 <i>R</i> )-4-(( <i>tert</i> -butyldimethylsilyl)oxy)-1,2,2-trimethylcyclopentyl)-2-oxoethyl 3,5-<br>dinitrobenzoate <b>(8)</b> .....               | 13 |
| ( $\pm$ ) (2 <i>S</i> , 4 <i>R</i> ) 4-[( <i>tert</i> -butyldimethylsilyl)oxy]-2-hydroxy-2,6,6-trimethylcyclohexane-1-<br>carbaldehyde <b>(7)</b> .....                         | 13 |
| ( $\pm$ ) (1 <i>R</i> ,4 <i>R</i> ,6 <i>S</i> )-4-(( <i>tert</i> -butyldimethylsilyl)oxy)-2,2,6-trimethyl-6-((trimethylsilyl)oxy)<br>cyclohexanecarbaldehyde <b>(9)</b> .....   | 14 |
| <b>E. <sup>1</sup>H and <sup>13</sup>C spectra for compounds 3, 4, 5, 1a, 1b, 2a, 2b, 6, 8, 7, 9</b> .....                                                                      | 14 |

## A. Materials and Methods

All experiments were carried out under argon surpressure unless otherwise stated, using oven-dried glassware. Solvents were purified as followed: THF, CH<sub>2</sub>Cl<sub>2</sub> and Et<sub>2</sub>O were dried on a GT S100 drying station (Glass Technology). DMF, DMSO and *i*-Pr<sub>2</sub>NEt were distilled from CaH<sub>2</sub>. MeOH was dried with sodium prior distillation. Commercial chemicals were used as received except for B(C<sub>6</sub>F<sub>5</sub>)<sub>3</sub> which was sublimated before use. Purification by flash column chromatography was carried out using Merck Kieselgel 60 silica gel (particle size: 32-63). Thin-layer chromatography (TLC) was performed using Merck pre-coated silica gel 60 F-254 sheets.

<sup>1</sup>H and <sup>13</sup>C NMR spectra were recorded on a Bruker AC-400 spectrometer. Chemical shifts (δ) are indicated in parts per million with tetramethylsilane as internal standard. The following abbreviations were used for signals description: s (singlet), d (doublet), t (triplet), q (quartet), qt (quintuplet), m (multiplet), bs (broad singlet). IR spectra were recorded using a Nicolet Avatar 370 DTGS FT-IR spectrometer. High-resolution mass spectra were determined on a Waters Micromass GCT Premier spectrometer. Melting points were determined on a Büchi B-540 apparatus and are uncorrected. Elemental analyses were performed by the *Service de Microanalyse*, CNRS ICSN, Gif-sur-Yvette.

## B. Synthesis of α-hydroxy spiroepoxides (1a) and (1b)

(±) 4-[(tert-butyldimethylsilyl)oxy]-2,6,6-trimethylcyclohex-2-en-1-one

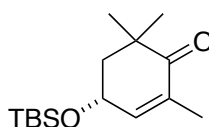

To a solution of phorenol<sup>1</sup> (5.69 g, 37 mmol) and imidazole (6.3 g, 92 mmol, 2.5 equiv) in anhydrous DMF (47 mL), cooled at 0 °C in an ice bath under argon, was added TBSCl (6.7 g, 44.3 mmol, 1.2 equiv). The reaction mixture was stirred for 1 h at 0 °C, then for 16 h at room temperature before hydrolysis by the addition of H<sub>2</sub>O (40 mL). The mixture was extracted with Et<sub>2</sub>O (3 x 50 mL) and the combined organic phase was washed with brine, dried with MgSO<sub>4</sub> and concentrated under reduced pressure. The oily residue was purified by flash chromatography on silica gel (98:2 to 95:5 cyclohexane/EtOAc) to afford the title compound as a pale yellow oil (8.50 g, 86% yield).

<sup>1</sup> Phorenol was prepared on a multigram-scale in three steps from 4-oxoisophorone, according to a reported procedure: Soukup, M.; Lukac, T.; Zell, R.; Roessler, F.; Steiner, K.; Widmer, E. *Helv. Chim. Acta* **1989**, 72, 365-369.

**<sup>1</sup>H NMR (400 MHz, CDCl<sub>3</sub>)** δ: 0.07 (s, 6H), 0.88 (s, 9H), 1.10 (s, 3H), 1.12 (s, 3H), 1.70 (s, 3H), 1.88 (dd, 1H, *J* = 9.7 and 12.9 Hz), 1.98 (ddd, 1H, *J* = 1.8, 5.4 and 12.9 Hz), 4.50 (m, 1H), 6.40 (s, 1H). **<sup>13</sup>C NMR (100.6 MHz, CDCl<sub>3</sub>)** δ: -4.6, -4.5, 16.2, 18.1, 24.6, 25.7 (3C), 25.8, 41.8, 47.0, 65.5, 133.2, 147.1, 203.8. **IR (neat)**: 2955, 2927, 2856, 1677, 1384, 1360, 1255, 1102, 870, 833, 773 cm<sup>-1</sup>. **Elemental analysis** calcd for C<sub>15</sub>H<sub>28</sub>O<sub>2</sub>Si: C 67.11, H 10.51; found: C 67.04, H 10.61.

(±) (1*S*, 5*R*, 6*S*)-5-[(*tert*-butyldimethylsilyl)oxy]-1,3,3-trimethyl-7-oxabicyclo[4.1.0]hepta-2-one  
**(3)**

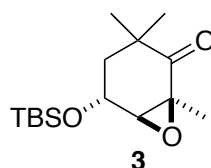

To a solution of (±) 4-[(*tert*-butyldimethylsilyl)oxy]-2,6,6-trimethylcyclohex-2-en-1-one (7.91 g, 29.5 mmol) in THF (75 mL), cooled to 0 °C in an ice bath, was added dropwise, *via* a dropping funnel, *tert*-butyl hydroperoxide (70% weight in H<sub>2</sub>O, 40.3 mL, 295 mmol, 10 equiv) and then Triton B (40% weight in MeOH, 2.6 mL, 5.9 mmol, 0.2 equiv). The reaction mixture was stirred for 1 h at 0 °C and for 16 h at room temperature before the addition of saturated aqueous NH<sub>4</sub>Cl (20 mL). After 10 min stirring, saturated aqueous Na<sub>2</sub>SO<sub>3</sub> (50 mL) was added to the mixture and stirring was continued for 1 h. The mixture was then extracted with Et<sub>2</sub>O (3 x 75 mL). The combined organic layer was washed successively with saturated aqueous NaHCO<sub>3</sub> (50 mL) and brine (75 mL), dried with MgSO<sub>4</sub>, filtered and concentrated under reduced pressure. The oily residue was purified by flash chromatography on silica gel (93:7 cyclohexane/EtOAc) to afford **3** as a colorless oil (7.19 g, 86% yield).

**<sup>1</sup>H NMR (400 MHz, CDCl<sub>3</sub>)** δ: 0.07 (s, 3H), 0.08 (s, 3H), 0.86 (s, 9H), 1.09 (s, 3H), 1.17 (s, 3H), 1.42 (s, 3H), 1.59 (ddd, 1H, *J* = 1.1, 3.2 and 14.4 Hz), 1.96 (dd, 1H, *J* = 3.2 and 14.4 Hz), 3.28 (dd, 1H, *J* = 1.1 and 3.2 Hz), 4.40 (q, 1H, *J* = 3.2 Hz). **<sup>13</sup>C NMR (100.6 MHz, CDCl<sub>3</sub>)** δ: -4.7, -4.6, 16.4, 18.2, 25.9 (3C), 27.8, 29.1, 40.8, 41.0, 59.1, 65.0, 66.7, 210.6. **IR (neat)**: 2956, 2930, 1707, 1472, 1385, 1361, 1257, 1085, 1060, 838 cm<sup>-1</sup>. **HRMS (FI<sup>+</sup>/GC)** calcd for C<sub>15</sub>H<sub>29</sub>O<sub>3</sub>Si ([M+H]<sup>+</sup>): 285.1886, found 285.1871.

(±) (1*S*, 5*R*, 6*S*)-5-hydroxy-1,3,3-trimethyl-7-oxabicyclo[4.1.0]hepta-2-one

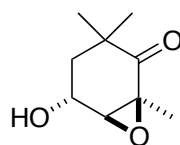

To a solution of compound **3** (5.92 g, 20.8 mmol) in anhydrous THF (125 mL) under argon was added TBAF (1 M in THF, 22 mL, 22.9 mmol, 1.1 equiv). The reaction mixture was stirred at room temperature for 1 h. EtOAc (60 mL) was then added, followed by H<sub>2</sub>O (60 mL). The aqueous phase was extracted with EtOAc (3 x 40 mL) and the combined organic layer was washed with brine (100 mL), dried with Na<sub>2</sub>SO<sub>4</sub>, filtered and concentrated under reduced pressure. The oily residue was purified by flash chromatography on silica gel (4:1 to 1:1 cyclohexane/EtOAc) to afford the title compound (3.35 g, 94% yield) as a pale yellow oil.

**<sup>1</sup>H NMR (400 MHz, CDCl<sub>3</sub>)** δ: 1.13 (s, 3H), 1.20 (s, 3H), 1.46 (s, 3H), 1.70 (ddd, 1H, *J* = 1.1, 3.5 and 14.6 Hz), 1.91 (bs, 1H), 2.05 (dd, 1H, *J* = 3.5 and 14.6 Hz), 3.44 (dd, 1H, *J* = 1.1 and 2.9 Hz), 4.53 (m, 1H). **<sup>13</sup>C NMR (100.6 MHz, CDCl<sub>3</sub>)** δ: 16.1, 27.4, 28.9, 40.8, 40.9, 59.0, 64.5, 65.8, 210.3. **IR (neat)**: 3459, 2974, 2933, 1697, 1471, 1447, 1384, 1359, 1142, 1057, 859 cm<sup>-1</sup>. **HRMS (F<sup>+</sup>/GC)** calcd for C<sub>9</sub>H<sub>14</sub>O<sub>3</sub> ([M]<sup>+</sup>): 170.0943, found 170.0941.

(±) (1*S*, 2*S*, 4*R*)-2,6,6-trimethylcyclohexane-1,2,4-triol (**4**)

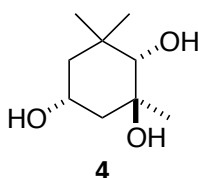

To a solution of (±) (1*S*, 5*R*, 6*S*)-5-hydroxy-1,3,3-trimethyl-7-oxabicyclo[4.1.0]hepta-2-one (3.34 g, 19.6 mmol) in anhydrous THF (200 mL) under argon was added dropwise LiAlH<sub>4</sub> (2.4 M in THF, 32.7 mL, 78.4 mmol, 4 equiv). The reaction mixture was stirred at room temperature for 16 h and was quenched at 0 °C by careful, dropwise addition of EtOAc (40 mL). After 5 min stirring were successively added, dropwise, H<sub>2</sub>O (3 mL), 15% weight aqueous NaOH (3 mL) and H<sub>2</sub>O (3 x 3 mL). The reaction mixture was stirred at room temperature for 1 h and filtered on a pad of Celite®. Aluminium salts were triturated and rinsed several times with THF before the filtrate was concentrated under reduced pressure to afford the triol **4** (3.07 g, 90% yield) as a white-off solid.

**<sup>1</sup>H NMR (400 MHz, CD<sub>3</sub>OD)** δ: 0.98 (s, 3H), 1.06 (s, 3H), 1.18 (dd, 1H, *J* = 11.5 and 12.6 Hz), 1.22 (s, 3H), 1.31 (dd, 1H, *J* = 11.5 and 13.2 Hz), 1.72 (ddd, 1H, *J* = 3.2, 4.2 and 12.6 Hz),

2.02 (ddd, 1H,  $J = 3.2, 4.2$  and  $13.2$  Hz), 2.98 (s, 1H), 3.99 (tt, 1H,  $J = 4.2$  and  $11.5$  Hz).  **$^{13}\text{C}$  NMR (100.6 MHz,  $\text{CD}_3\text{OD}$ )**  $\delta$ : 21.3, 29.6, 32.0, 37.6, 48.3, 49.6, 64.7, 74.7, 81.4. **IR (KBr)**: 3358, 2965, 1460, 1385, 1365, 1260, 1151, 1133, 1058, 959, 814  $\text{cm}^{-1}$ . **Mp**: 136.3-137.3 °C. **HRMS ( $\text{Cl}^+\text{NH}_3/\text{GC}$ )** calcd for  $\text{C}_9\text{H}_{22}\text{NO}_3$  ( $[\text{M}+\text{NH}_4]^+$ ): 192.1600, found 192.1607.

(±) (1*S*, 2*S*, 5*R*)-5-[(*tert*-butyldimethylsilyl)oxy]-1,3,3-trimethylcyclohexane-1,2-diol

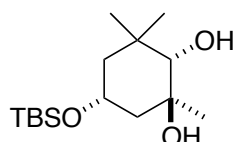

To a solution of **4** (3.05 g, 17.5 mmol) and imidazole (4.02 g, 59.1 mmol, 3.4 equiv) in anhydrous DMF (150 mL), cooled at 0 °C in an ice bath under argon, was added TBSCl (5.28 g, 35 mmol, 2 equiv). The reaction mixture was stirred for 1 h at 0 °C and for 16 h at room temperature before hydrolysis by the addition of  $\text{H}_2\text{O}$  (75 mL). The mixture was extracted with  $\text{Et}_2\text{O}$  (3 x 75 mL) and the combined organic layer was washed with brine (100 mL), dried with  $\text{Na}_2\text{SO}_4$ , filtered and concentrated under reduced pressure. The oily residue was purified by flash chromatography on silica gel (9:1 to 8:2 cyclohexane/ $\text{EtOAc}$ ) to afford the title compound as a white solid (4.37 g, 87% yield).

**$^1\text{H}$  NMR (400 MHz,  $\text{CDCl}_3$ )**  $\delta$ : 0.00 (s, 6H), 0.82 (s, 9H), 0.92 (s, 3H), 0.98 (s, 3H), 1.18 (s, 3H), 1.19 (dd, 1H,  $J = 11.9$  and  $12.2$  Hz), 1.32 (dd, 1H,  $J = 11.2$  and  $13.5$  Hz), 1.60 (ddd, 1H,  $J = 3.1, 3.6$  and  $12.2$  Hz), 1.76 (d, 1H,  $J = 7.0$  Hz), 1.94 (ddd, 1H,  $J = 3.1, 4.3$  and  $13.5$  Hz), 2.98 (d, 1H,  $J = 7.0$  Hz), 3.98-4.06 (m, 1H).  **$^{13}\text{C}$  NMR (100.6 MHz,  $\text{CDCl}_3$ )**  $\delta$ : -6.7, -6.6, 16.1, 18.4, 23.8 (3C), 27.4, 29.0, 34.4, 45.5, 46.7, 62.5, 71.7, 78.2. **IR (KBr)**: 3433, 2954, 2859, 1476, 1387, 1364, 1258, 1150, 1073, 837  $\text{cm}^{-1}$ . **Mp**: 89.0-89.4 °C. **Elemental analysis** calcd for  $\text{C}_{15}\text{H}_{32}\text{O}_3\text{Si}$ : C 62.45, H 11.18; found: C 62.18, H 11.21.

(±) (2*R*,4*S*)-4-[(*tert*-butyldimethylsilyl)oxy]-2-hydroxy-2,6,6-trimethylcyclohexanone (**5**)

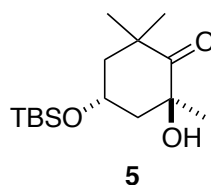

To a solution of (±) (1*S*, 2*S*, 5*R*)-5-[(*tert*-butyldimethylsilyl)oxy]-1,3,3-trimethylcyclohexane-1,2-diol (2 g, 6.94 mmol) in EtOAc (47 mL, C = 0.14 M), was added IBX<sup>2</sup> (9.2 g, 32.9 mmol, 4.75 equiv). The resulting suspension was heated for 20 h at 80 °C in an oil bath under vigorous magnetic stirring (TLC control). The reaction mixture was then cooled to room temperature and filtered through a glass frit. The solid was washed with EtOAc and the combined filtrates were concentrated *in vacuo* to afford **5** as a pale yellow oil (1.84 g, 92% yield).

<sup>1</sup>H NMR (400 MHz, CDCl<sub>3</sub>) δ: 0.07 (s, 3H), 0.08 (s, 3H), 0.89 (s, 9H), 1.16 (s, 3H), 1.28 (s, 3H), 1.47 (s, 3H), 1.83-1.86 (m, 2H), 2.06 (d, 2H, *J* = 5.3 Hz), 3.31 (bs, 1H, OH), 4.23 (qt, 1H, *J* = 5.3 Hz). <sup>13</sup>C NMR (100.6 MHz, CDCl<sub>3</sub>) δ: -4.7, -4.6, 18.3, 26.0 (3C), 28.1 (2C), 29.1, 43.5, 47.1, 47.4, 65.3, 75.1, 218.2. IR (neat): 3450, 2930, 2857, 1711, 1472, 1384, 1255, 1165, 1030, 998 cm<sup>-1</sup>. HRMS (EI<sup>+</sup>/GC) calcd for C<sub>15</sub>H<sub>30</sub>O<sub>3</sub>Si ([M]<sup>+</sup>): 286.1964, found 286.1964.

### Access to α-hydroxyepoxides (**1a**) and (**1b**) from ketone (**5**)

#### *Epoxidation protocol using trimethylsulfoxonium ylide*

To a suspension of NaH (60% in oil, 705 mg, 17.5 mmol, 10 equiv) in anhydrous DMSO (28 mL), under argon, was added trimethylsulfoxonium iodide (5.76 g, 26.2 mmol, 15 equiv). The reaction mixture was stirred at room temperature for 1 h. THF (28 mL) and Lil (2.81 g, 21 mmol, 12 equiv) were added and stirring was continued for 1 h. After cooling to 0 °C, a solution of **5** (500 mg, 1.75 mmol) in DMSO/THF: 1/1 (28 mL) was added and the reaction mixture was heated at 50 °C for 16 h (TLC control). The reaction was quenched with Et<sub>2</sub>O/H<sub>2</sub>O: 1/1 (50 mL) and the mixture was extracted with Et<sub>2</sub>O (3 x 50 mL). The combined organic layer was washed with brine (2 x 100 mL), dried over Na<sub>2</sub>SO<sub>4</sub> and concentrated *in vacuo*. The mixture of **1a** and **1b** (82:18 dr) was separated by chromatography on silica gel (95:5 cyclohexane/EtOAc) to afford **1a** as a pale yellow oil (285 mg, 55% yield) and **1b** as white crystals (99 mg, 18% yield).

<sup>2</sup> IBX was prepared according to the literature: Frigerio, M.; Santagostino, M.; Sputore, S. *J. Org. Chem.* **1999**, *64*, 4537.

*Epoxidation protocol using trimethylsulfonium ylide*

A suspension of NaH (60% in oil, 340 mg, 5.1 mmol, 3 equiv) in anhydrous DMSO (12 mL) was stirred for 1 h at 70 °C under argon atmosphere. After cooling to room temperature, THF (12 mL) was added and the reaction mixture was cooled to 0 °C before the addition of a solution of trimethylsulfonium iodide (1.04 g, 5.1 mmol, 3 equiv) in DMSO (12 mL). The reaction mixture was stirred at 0 °C for 15 min and a solution of **5** (500 mg, 1.75 mmol) in THF (5 mL) was added. Stirring was continued for 3 h at 0 °C (TLC control). The reaction was quenched with Et<sub>2</sub>O/H<sub>2</sub>O: 1/1 (50 mL) and the mixture was extracted with Et<sub>2</sub>O (3 x 50 mL). The combined organic phase was washed with brine (2 x 100 mL), dried over Na<sub>2</sub>SO<sub>4</sub> and concentrated *in vacuo*. The mixture of **1a** and **1b** (14:86 dr) was separated by chromatography on silica gel (95:5 cyclohexane/EtOAc) to afford **1a** as a pale yellow oil (45 mg, 9% yield) and **1b** as white crystals (340 mg, 65% yield).

(±) (3*R*, 4*S*, 6*R*) 6-[(*tert*-butyldimethylsilyl)oxy]-4,8,8-trimethyl-1-oxaspiro[2.5]octan-4-ol (**1a**)

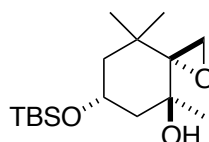

**1a**

**<sup>1</sup>H NMR (400 MHz, CDCl<sub>3</sub>)** δ: 0.06 (s, 6H), 0.76 (s, 3H), 0.88 (s, 9H), 1.07 (s, 3H), 1.25 (s, 3H), 1.49 (dd, 1H, *J* = 12.6 and 11.1 Hz), 1.59 (dd, 1H, *J* = 13.4 and 11.1 Hz), 1.63 (ddd, 1H, *J* = 12.6, 4.2 and 2.5 Hz), 1.90 (ddd, 1H, *J* = 13.4, 4.2 and 2.5 Hz), 2.64 (d, 1H, *J* = 4.1 Hz), 2.76 (d, 1H, *J* = 4.1 Hz), 4.19 (tt, 1H, *J* = 11.1 and 4.2 Hz). **<sup>13</sup>C NMR (100.6 MHz, CDCl<sub>3</sub>)** δ: -4.4, -4.3, 18.4, 26.1 (3C), 26.2, 26.3, 27.3, 35.3, 45.0, 48.4, 48.5, 62.6, 64.8, 75.6. **IR (neat)**: 3509, 2927, 2856, 1472, 1376, 1252, 1084, 1069, 832 cm<sup>-1</sup>. **HRMS (GC/CI<sup>+</sup>NH<sub>3</sub>)** calcd for C<sub>16</sub>H<sub>33</sub>O<sub>3</sub>Si ([M+H]<sup>+</sup>): 301.2199, found 301.2210.

(±) (3*S*, 4*S*, 6*R*) 6-[(*tert*-butyldimethylsilyl)oxy]-4,8,8-trimethyl-1-oxaspiro[2.5]octan-4-ol (**1b**)

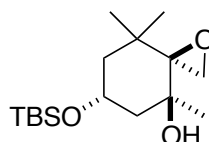

**1b**

**<sup>1</sup>H NMR (400 MHz, CDCl<sub>3</sub>)** δ: 0.06 (s, 6H), 0.88 (s, 9H), 0.98 (s, 3H), 1.06 (s, 3H), 1.22 (s, 3H), 1.47 (dd, 1H, *J* = 13.3 and 7.9 Hz), 1.65 (dd, 1H, *J* = 13.6 and 7.9 Hz), 1.72 (ddd, 1H, *J* = 13.6, 4.1 and 1.9 Hz), 1.92 (ddd, 1H, *J* = 13.3, 4.1 and 1.9 Hz), 2.01 (sl, 1H, OH), 2.81 (d,

1H,  $J = 4.2$  Hz), 2.82 (d, 1H,  $J = 4.2$  Hz), 4.21 (tt, 1H,  $J = 7.9$  and 4.1 Hz).  **$^{13}\text{C}$  NMR (100.6 MHz,  $\text{CDCl}_3$ )**  $\delta$ : -4.6 (2C), 18.3, 26.1 (3C), 26.2, 27.2, 28.6, 34.7, 47.5, 47.6, 49.5, 65.8, 65.9, 72.0. **IR (neat)**: 3479, 2925, 2855, 1459, 1370, 1248, 1065, 827  $\text{cm}^{-1}$ . **Mp**: 73.7-74.2 °C. **HRMS ( $\text{CI}^+\text{NH}_3$ )** calcd for  $\text{C}_{16}\text{H}_{33}\text{O}_3\text{Si}$  ( $[\text{M}+\text{H}]^+$ ): 301.2199, found 301.2203. **Elemental analysis** calcd for  $\text{C}_{16}\text{H}_{32}\text{O}_3\text{Si}$ : C 63.95, H 10.73; found: C 63.86, H 10.67.

### C. Synthesis of $\alpha$ -silyloxy spiroepoxides (**2a**) and (**2b**)

( $\pm$ ) (3*R*, 4*S*, 6*R*) 6-[(*tert*-butyldimethylsilyl)oxy]-4-[(trimethylsilyl)oxy]-4,8,8-trimethyl-1-oxaspiro[2.5]octane (**2a**)

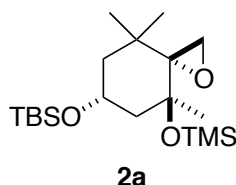

To a solution of **1a** (100 mg, 0.33 mmol) and imidazole (57 mg, 0.84 mmol, 2.5 equiv) in anhydrous DMF (2 mL), cooled at 0 °C in an ice bath under argon, was added TMSCl (50  $\mu\text{L}$ , 0.34 mmol, 1.2 equiv). The reaction mixture was stirred for 4 h at room temperature before hydrolysis by the addition of  $\text{H}_2\text{O}$  (2 mL). The mixture was extracted with  $\text{Et}_2\text{O}$  (3 x 2 mL) and the combined organic phase was washed with brine, dried with  $\text{Na}_2\text{SO}_4$  and concentrated under reduced pressure. The oily residue was purified by flash chromatography on silica gel (7:3 cyclohexane/ $\text{EtOAc}$ ) to afford **2a** as a colorless oil (100 mg, 81% yield).

**$^1\text{H}$  NMR (400 MHz,  $\text{CDCl}_3$ )**  $\delta$ : 0.06 (s, 6H), 0.10 (s, 9H), 0.73 (s, 3H), 0.88 (s, 9H), 1.09 (s, 3H), 1.21 (s, 3H), 1.41-1.53 (m, 2H), 1.60 (ddd, 1H,  $J = 12.6, 4.0$  and 2.6 Hz), 1.89 (ddd, 1H,  $J = 13.0, 4.0$  and 2.6 Hz), 2.62 (d, 1H,  $J = 4.1$  Hz), 2.69 (d, 1H,  $J = 4.1$  Hz), 4.17 (tt, 1H,  $J = 11.2$  and 4.0 Hz).  **$^{13}\text{C}$  NMR (100.6 MHz,  $\text{CDCl}_3$ )**  $\delta$ : -4.3, -4.2, 2.7 (3C), 18.4, 24.6, 26.2 (3C), 26.5, 27.5, 35.4, 45.6, 48.5, 49.9, 62.6, 65.2, 78.2. **IR (neat)**: 2956, 2929, 1250, 1128, 1070, 832, 772  $\text{cm}^{-1}$ . **HRMS ( $\text{FI}^+\text{GC}$ )** calcd for  $\text{C}_{19}\text{H}_{40}\text{O}_3\text{Si}_2$  ( $[\text{M}]^+$ ): 372.2516, found 372.2498.

(±) (3*S*, 4*S*, 6*R*) 6-[(*tert*-butyldimethylsilyl)oxy]-4-[(trimethylsilyl)oxy]-4,8,8-trimethyl-1-oxaspiro[2.5]octane (**2b**)

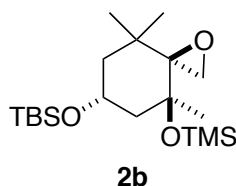

To a solution of **1b** (390 mg, 1.29 mmol) and imidazole (224 mg, 3.30 mmol, 2.54 equiv) in anhydrous DMF (2 mL), cooled at 0 °C in an ice bath under argon, was added dropwise TMSCl (250  $\mu$ L, 1.94 mmol, 1.5 equiv). The reaction mixture was stirred for 4 h at room temperature before hydrolysis by the addition of H<sub>2</sub>O (6 mL). The mixture was extracted with Et<sub>2</sub>O (3 x 2 mL) and the combined organic phase was washed with brine, dried with Na<sub>2</sub>SO<sub>4</sub> and concentrated under reduced pressure. The oily residue was purified by flash chromatography on silica gel (7:3 cyclohexane/EtOAc) to afford the title compound as a colorless oil (380 mg, 79% yield).

**<sup>1</sup>H NMR (400 MHz, CDCl<sub>3</sub>)**  $\delta$ : 0.07 (s, 6H), 0.11 (s, 9H), 0.73 (s, 3H), 0.89 (s, 9H), 1.08 (s, 3H), 1.21 (s, 3H), 1.36-1.44 (m, 2H), 1.77 (ddd, 1H, *J* = 12.8, 4.0 and 3.2 Hz), 2.03 (ddd, 1H, *J* = 12.9, 4.0 and 3.2 Hz), 2.57 (d, 1H, *J* = 4.2 Hz), 2.73 (d, 1H, *J* = 4.2 Hz), 4.23 (tt, 1H, *J* = 4.0 and 10.9 Hz). **<sup>13</sup>C NMR (100.6 MHz, CDCl<sub>3</sub>)**  $\delta$ : -4.4 (2C), 2.8 (3C), 18.5, 25.7, 26.2 (4C), 28.9, 35.2, 49.9, 50.0, 51.2, 64.6, 65.1, 77.4. **IR (neat)**: 2954, 2928, 1370, 1250, 1128, 1076, 1011, 832, 773 cm<sup>-1</sup>. **HRMS (FI<sup>+</sup>/GC)** calcd for C<sub>19</sub>H<sub>40</sub>O<sub>3</sub>Si<sub>2</sub> ([M]<sup>+</sup>): 372.2516, found 372.2538.

#### D. Acid-induced rearrangements protocols on compounds (1) and (2)

##### SnCl<sub>4</sub> and BF<sub>3</sub>·OEt<sub>2</sub> protocol

To a stirred solution of **1** or **2** (100 mg) in anhydrous CH<sub>2</sub>Cl<sub>2</sub> (10 mL/mmol), cooled to -78 °C under argon surpressure, was added dropwise the Lewis acid (see tables 1 and 2). The reaction mixture was stirred at -78 °C and the temperature was increased to -20 °C if required (TLC monitoring). The reaction mixture was quenched with saturated aqueous NaHCO<sub>3</sub> (5 mL) and extracted with Et<sub>2</sub>O (3 x 5 mL). The combined organic phase was washed with brine (15 mL), dried over Na<sub>2</sub>SO<sub>4</sub>, filtered and concentrated *in vacuo*. When the product **6** was formed during the reaction, the crude product was purified by chromatography on silica gel (95:5 cyclohexane/EtOAc) to afford **6** as a colorless oil.

##### Yb(OTf)<sub>3</sub> protocol

To a stirred solution of **1** or **2** (100 mg) in anhydrous CH<sub>2</sub>Cl<sub>2</sub> (5 mL/mmol), at room temperature and under argon surpressure, was added anhydrous Yb(OTf)<sub>3</sub> (0.2 equiv). The

mixture was stirred at room temperature and the temperature was increased to reflux if required (TLC monitoring). The reaction mixture was quenched with H<sub>2</sub>O (3 mL) and extracted with Et<sub>2</sub>O (3 x 5 mL). The combined organic phase was washed with brine (15 mL), dried over Na<sub>2</sub>SO<sub>4</sub>, filtered and concentrated *in vacuo*. When the product **6** was formed during the reaction, the crude product was purified by chromatography on silica gel (97:3 cyclohexane/EtOAc) to afford **6** as a colorless oil.

### MABR protocol

To a degassed solution of 4-bromo-2,6-di-*tert*-butylphenol (4 equiv) in anhydrous CH<sub>2</sub>Cl<sub>2</sub> (2.5 mL/mmol), under argon, was added under magnetic stirring a 1M hexane solution of Me<sub>3</sub>Al (2 equiv). After 1 h stirring at room temperature, the reaction mixture was cooled to -78 °C and a solution of **1** or **2** (100 mg, 1 equiv) in anhydrous CH<sub>2</sub>Cl<sub>2</sub> (10 mL/mmol) was added dropwise. The mixture was stirred at -78 °C and the temperature was increased to -20 °C if required (TLC monitoring). The reaction mixture was quenched with saturated aqueous NH<sub>4</sub>Cl (5 mL) and extracted with CH<sub>2</sub>Cl<sub>2</sub> (3 x 5 mL). The combined organic phase was washed with saturated aqueous NaHCO<sub>3</sub> (10 mL), dried over Na<sub>2</sub>SO<sub>4</sub>, filtered and concentrated *in vacuo*. The crude product was purified by chromatography on silica gel (99:1 to 95:5 cyclohexane/EtOAc).

### B(C<sub>6</sub>F<sub>5</sub>)<sub>3</sub> protocol

To a stirred solution of **1** or **2** in anhydrous THF (0.15 M), cooled to -20 °C under argon surpressure, was added B(C<sub>6</sub>F<sub>5</sub>)<sub>3</sub> (0.1 equiv). The reaction mixture was warmed to room temperature and stirred for 1 h or 15 h (see tables 1 and 2). The temperature was then raised to 60 °C and stirring was continued for 12 h or 15 h. The reaction mixture was quenched with NaHCO<sub>3</sub> and the aqueous layer was extracted with Et<sub>2</sub>O (3 x). The combined organic phase was dried over Na<sub>2</sub>SO<sub>4</sub>, filtered and concentrated *in vacuo*.

### *t*-BuMe<sub>2</sub>SiOTf/*i*-Pr<sub>2</sub>NEt protocol on substrate **1** (Jung's protocol<sup>3</sup>)

To a solution of **1** in anhydrous CH<sub>2</sub>Cl<sub>2</sub> (0.1 M) was successively added activated powdered 4Å molecular sieves (0.1 g/mmol of substrate) and *i*-Pr<sub>2</sub>NEt (1.8 equiv). After cooling to -50 °C, *t*-BuMe<sub>2</sub>SiOTf was introduced (1.7 equiv) and the reaction mixture was stirred at this temperature for 1 h. The temperature was allowed to warm to 0 °C and stirring was continued for 1 h. *i*-Pr<sub>2</sub>NEt (1.2 equiv) and *t*-BuMe<sub>2</sub>SiOTf (1.2 equiv) were then successively added and stirring was continued for 15 h. The reaction mixture was quenched with H<sub>2</sub>O and the

<sup>3</sup> Jung, M. E.; Allen, D. A. *Org. Lett.* **2008**, *10*, 2039.

aqueous layer was extracted with Et<sub>2</sub>O (3x). The combined organic layer was washed with brine (1x), dried over Na<sub>2</sub>SO<sub>4</sub>, filtered and the solvent was removed under reduced pressure to afford the unchanged substrate **1**.

### Me<sub>3</sub>SiOTf/*i*-Pr<sub>2</sub>NEt protocol on substrate **2** (Jung's protocol)

To a solution of **2** in anhydrous CH<sub>2</sub>Cl<sub>2</sub> (0.1 M) was successively added activated powdered 4Å molecular sieves (0.1 g/mmol of substrate) and *i*-Pr<sub>2</sub>NEt (1.8 equiv). After cooling to -50 °C, Me<sub>3</sub>SiOTf was introduced (1.7 equiv) and the temperature was allowed to warm to -35 °C. After a total 1 h stirring, no substrate was remaining from TLC analysis. The reaction mixture was quenched with H<sub>2</sub>O and the aqueous layer was extracted with Et<sub>2</sub>O (3x). The combined organic layer was dried over MgSO<sub>4</sub>, filtered and concentrated *in vacuo*, affording a complex mixture of products as an oily residue.

(±) 1-((1*S*, 4*R*)-4-((*tert*-butyldimethylsilyl)oxy)-1,2,2-trimethylcyclopentyl)-2-hydroxyethanone (**6**)

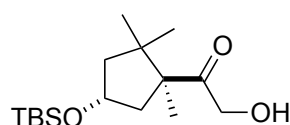

**6**

**<sup>1</sup>H NMR (400 MHz, CDCl<sub>3</sub>)** δ: 0.00 (s, 6H), 0.77 (s, 3H), 0.84 (s, 9H), 1.12 (s, 3H), 1.25 (s, 3H), 1.49 (dd, 1H, *J* = 14.0 and 3.0 Hz), 1.64 (dd, 1H, *J* = 13.6 and 4.2 Hz), 1.93 (dd, 1H, *J* = 13.6 and 7.8 Hz), 2.64 (dd, *J* = 14.0 and 8.2 Hz), 3.28 (bs, 1H, OH), 4.20 (d, 1H, *J* = 18.9 Hz), 4.28 (d, 1H, *J* = 18.9 Hz), 4.39 (tdd, 1H, *J* = 8.0, 4.2 and 3.0 Hz). **<sup>13</sup>C NMR (100.6 MHz, CDCl<sub>3</sub>)** δ: -4.6, -4.5, 18.1, 20.2, 25.1, 26.0, 26.1 (3C), 44.8, 45.5, 51.3, 57.8, 67.0, 70.8, 214.7. **IR (neat)**: 3781, 2928, 2857, 1698, 1380, 1360, 1255 cm<sup>-1</sup>. **HRMS (GC/CI<sup>+</sup>NH<sub>3</sub>)** calcd for C<sub>16</sub>H<sub>33</sub>O<sub>3</sub>Si ([M+H]<sup>+</sup>): 301.2199, found 301.2215.

(±) 2-((1*S*, 4*R*)-4-((*tert*-butyldimethylsilyl)oxy)-1,2,2-trimethylcyclopentyl)-2-oxoethyl 3,5-dinitrobenzoate (**8**)

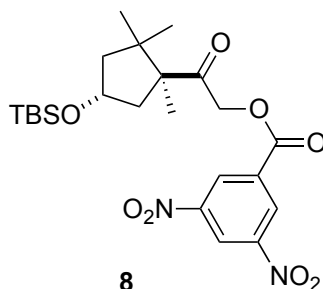

To a solution of alcohol **6** (100 mg, 0.33 mmol) in anhydrous CH<sub>2</sub>Cl<sub>2</sub> (1.5 mL), under argon, were successively added *i*-Pr<sub>2</sub>NEt (174 μL, 1 mmol, 3.0 equiv), 3,5-dinitrobenzoyl chloride (152 mg, 0.66 mmol, 2.0 equiv) and 4-DMAP (10 mg, 0.08 mmol, 0.25 equiv). The reaction mixture was stirred at room temperature for 4 h (TLC control) and quenched with saturated aqueous NaHCO<sub>3</sub> (2.5 mL). After 10 minutes stirring at room temperature, the mixture was extracted with CH<sub>2</sub>Cl<sub>2</sub> (3 x 3 mL) and the combined organic phase was washed with brine, dried over MgSO<sub>4</sub>, filtered and concentrated *in vacuo*. The brown residue was purified by flash chromatography on silica gel (9:1 cyclohexane/EtOAc) to afford the title compound as white crystals (273 mg, 71% yield).

**<sup>1</sup>H NMR (400 MHz, CDCl<sub>3</sub>)** δ: 0.00 (s, 3H), 0.01 (s, 3H), 0.86 (s, 9H), 0.94 (s, 3H), 1.18 (s, 3H), 1.39 (s, 3H), 1.55 (dd, 1H, *J* = 14.0 and 2.9 Hz), 1.68 (dd, 1H, *J* = 13.7 and 4.2 Hz), 1.96 (dd, 1H, *J* = 13.7 and 7.6 Hz), 2.70 (dd, 1H, *J* = 14.0 and 8.1 Hz), 4.39 (m, 1H), 5.08 (d, 1H, *J* = 16.5 Hz), 5.19 (d, 1H, *J* = 16.5 Hz), 9.18 (d, 2H, *J* = 2.1 Hz), 9.22 (t, 1H, *J* = 2.1 Hz). **<sup>13</sup>C NMR (100.6 MHz, CDCl<sub>3</sub>)** δ: -4.6 (2C), 18.1, 20.4, 25.1, 25.8, 26.0 (3C), 44.9, 45.7, 51.3, 58.6, 69.0, 70.6, 122.8, 129.8, 133.5, 148.9, 162.2, 205.9. **IR (neat)**: 2928, 2855, 1736, 1715, 1542, 1344, 1253, 1056, 832, 772 cm<sup>-1</sup>. **Mp**: 102.9-103.3. **Elemental analysis** calcd for C<sub>23</sub>H<sub>34</sub>N<sub>2</sub>O<sub>8</sub>Si: C 55.85, H 6.93, N 5.66; found: C 55.82, H 6.72, N 5.60.

(±) (2*S*, 4*R*) 4-[(*tert*-butyldimethylsilyl)oxy]-2-hydroxy-2,6,6-trimethylcyclohexane-1-carbaldehyde (**7**)

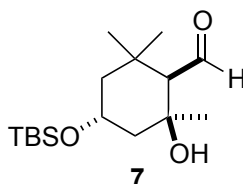

To a solution of compound **9** (60 mg, 0.17 mmol) in anhydrous MeOH (1 mL), under argon, was added PPTS (43 mg, 0.17 mmol, 1 equiv). The reaction mixture was stirred for 4 h at room temperature before hydrolysis with a saturated NaHCO<sub>3</sub> aqueous solution. The reaction mixture was extracted with Et<sub>2</sub>O (3x) and the combined organic layer was washed with brine,

dried over  $\text{MgSO}_4$  and concentrated under reduced pressure. The oily residue was purified by flash chromatography on silica gel (9:1 cyclohexane/EtOAc) to afford the title compound as a pale yellow oil (15 mg, 30% yield).

**$^1\text{H}$  NMR (400 MHz,  $\text{CDCl}_3$ )**  $\delta$ : 0.03 (s, 6H), 0.84 (s, 9H), 1.11 (s, 3H), 1.12 (s, 3H), 1.15-1.27 (m, 2H), 1.19 (s, 3H), 1.61 (ddd, 1H,  $J = 12.7, 4.1$  and  $2.0$  Hz), 1.87 (ddd, 1H,  $J = 13.3, 4.1$  and  $2.0$  Hz), 2.10 (d, 1H,  $J = 2.6$  Hz), 2.85 (bs, 1H), 4.06 (tt, 1H,  $J = 11.2$  and  $4.1$  Hz), 10.02 (d, 1H,  $J = 2.6$  Hz).  **$^{13}\text{C}$  NMR (100.6 MHz,  $\text{CDCl}_3$ )**  $\delta$ : -4.4 (2C), 18.3, 23.9, 26.1 (3C), 31.1, 32.3, 36.4, 49.6, 51.4, 64.3, 64.8, 73.4, 209.0. **Mp**: 74.5-75 °C. **IR (neat)**: 3430, 2954, 2925, 2854, 1705, 1384, 1248, 1180, 1064, 830, 776  $\text{cm}^{-1}$ . **HRMS (GC/ $\text{CI}^+\text{NH}_3$ )** calcd for  $\text{C}_{16}\text{H}_{33}\text{O}_3\text{Si}$  ( $[\text{M}+\text{H}]^+$ ): 301.2199, found 301.2206.

( $\pm$ ) (1*R*,4*R*,6*S*)-4-((*tert*-butyldimethylsilyl)oxy)-2,2,6-trimethyl-6-((trimethylsilyl)oxy) cyclohexanecarbaldehyde (**9**)

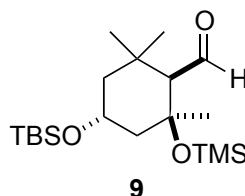

The MABR protocol was applied to substrate **2a** (100 mg, 0.27 mmol). The reaction was performed at -78 °C during 1 h to afford aldehyde **9** as a colorless oil after chromatography (98 mg, 98% yield).

**$^1\text{H}$  NMR (400 MHz,  $\text{CDCl}_3$ )**  $\delta$ : 0.07 (s, 6H), 0.14 (s, 9H), 0.88 (s, 9H), 0.89 (s, 3H), 1.11-1.22 (m, 2H), 1.22 (s, 3H), 1.24 (s, 3H), 1.50 (d, 1H,  $J = 5.1$  Hz), 1.61 (ddd, 1H,  $J = 12.8, 4.0$  and  $2.0$  Hz), 1.98 (ddd, 1H,  $J = 13.3, 4.0$  and  $J = 2.0$  Hz), 4.11 (tt, 1H,  $J = 11.2$  and  $4.0$  Hz), 9.86 (d, 1H,  $J = 5.1$  Hz).  **$^{13}\text{C}$  NMR (100.6 MHz,  $\text{CDCl}_3$ )**  $\delta$ : -4.3, -4.2, 2.6 (3C), 18.3, 23.3, 26.1 (3C), 30.5, 32.4, 35.8, 50.0, 51.2, 65.3, 66.0, 76.5, 208.9. **IR (neat)**: 2955, 2928, 1718, 1472, 1378, 1250, 1063 1005, 832, 773  $\text{cm}^{-1}$ . **HRMS ( $\text{CI}^+/\text{GC}$ )** calcd for  $\text{C}_{19}\text{H}_{41}\text{O}_3\text{Si}_2$  ( $[\text{M}+\text{H}]^+$ ): 373.2594 found 373.2591.

**E.  $^1\text{H}$  and  $^{13}\text{C}$  spectra for compounds 3, 4, 5, 1a, 1b, 2a, 2b, 6, 8, 7, 9**

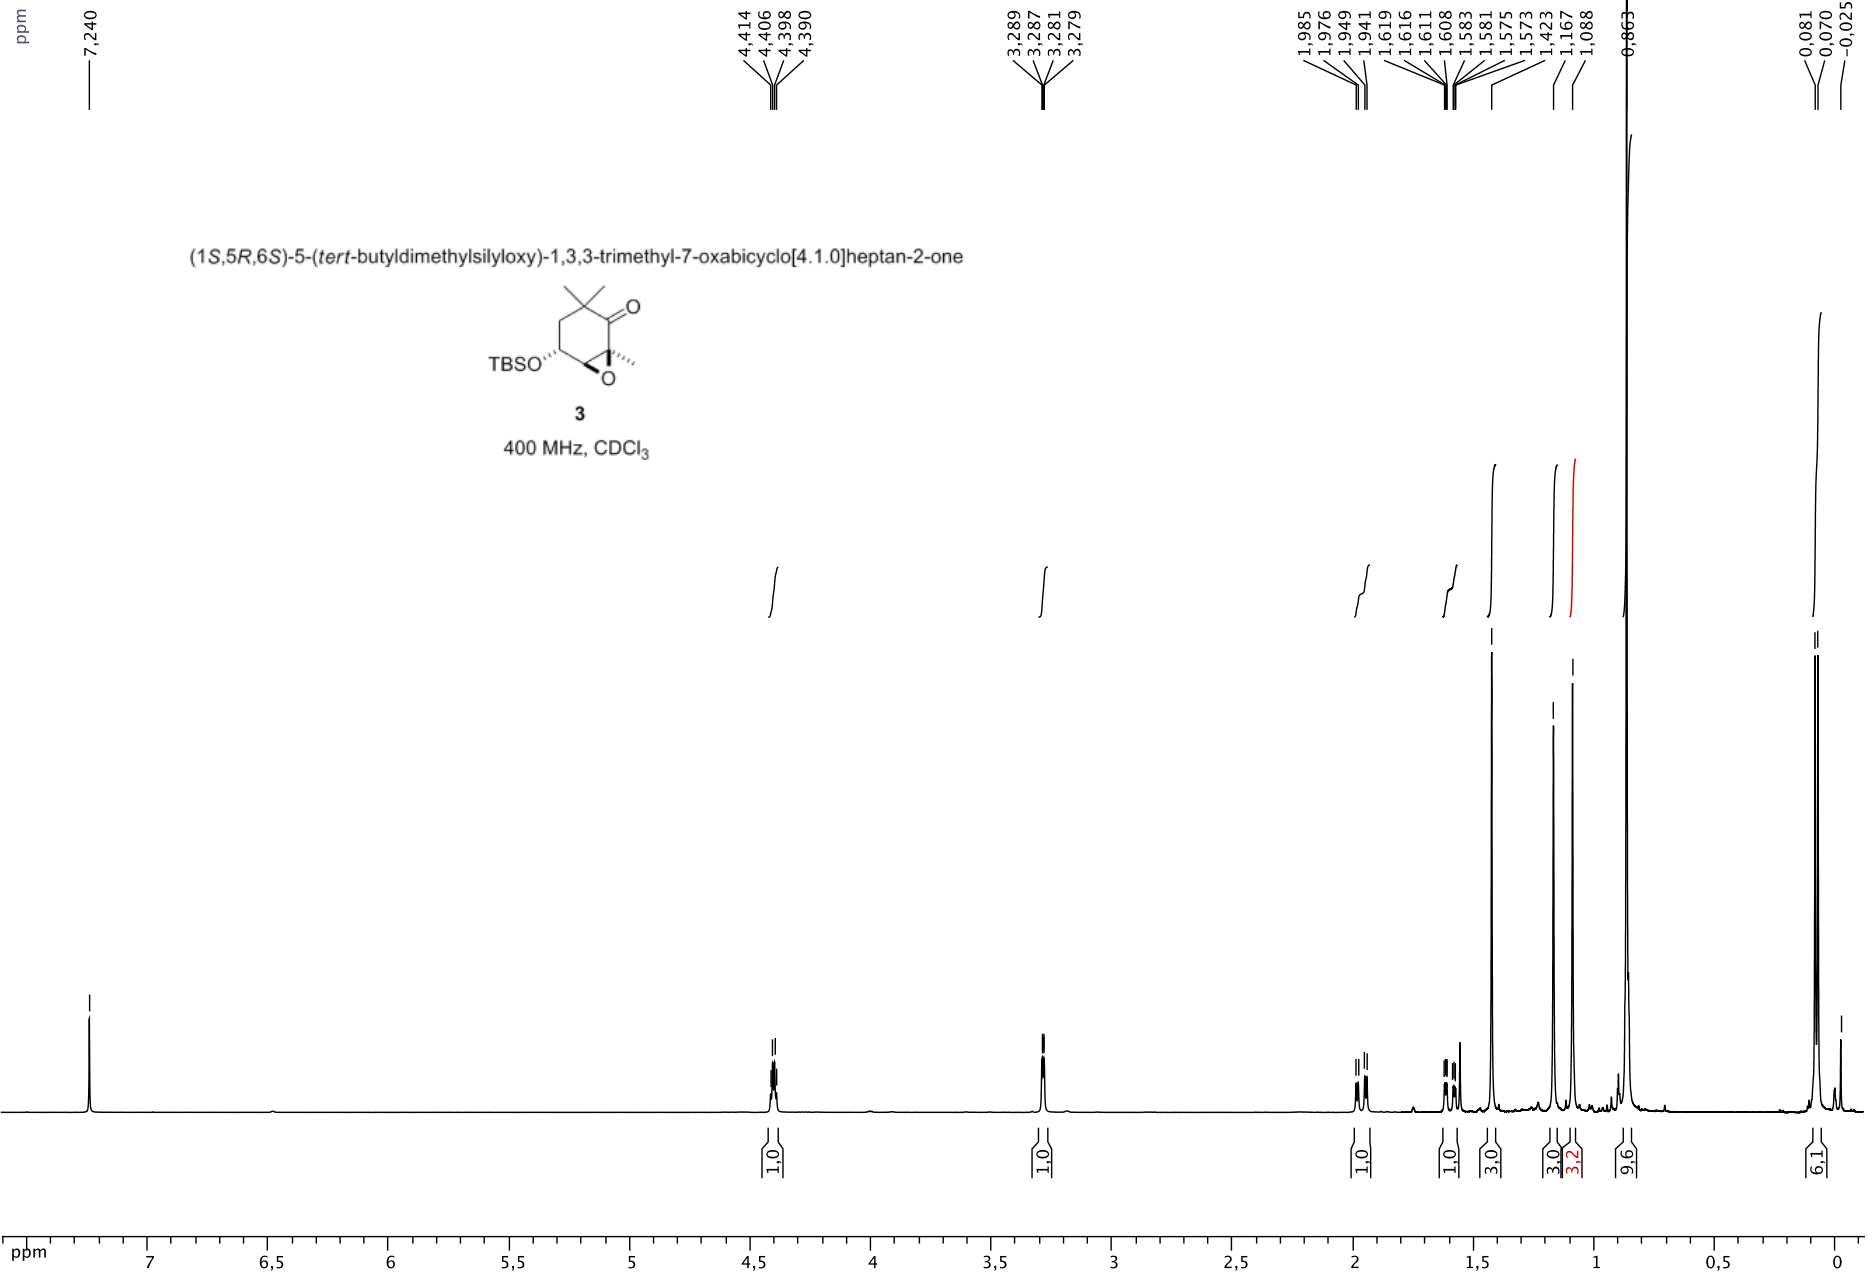

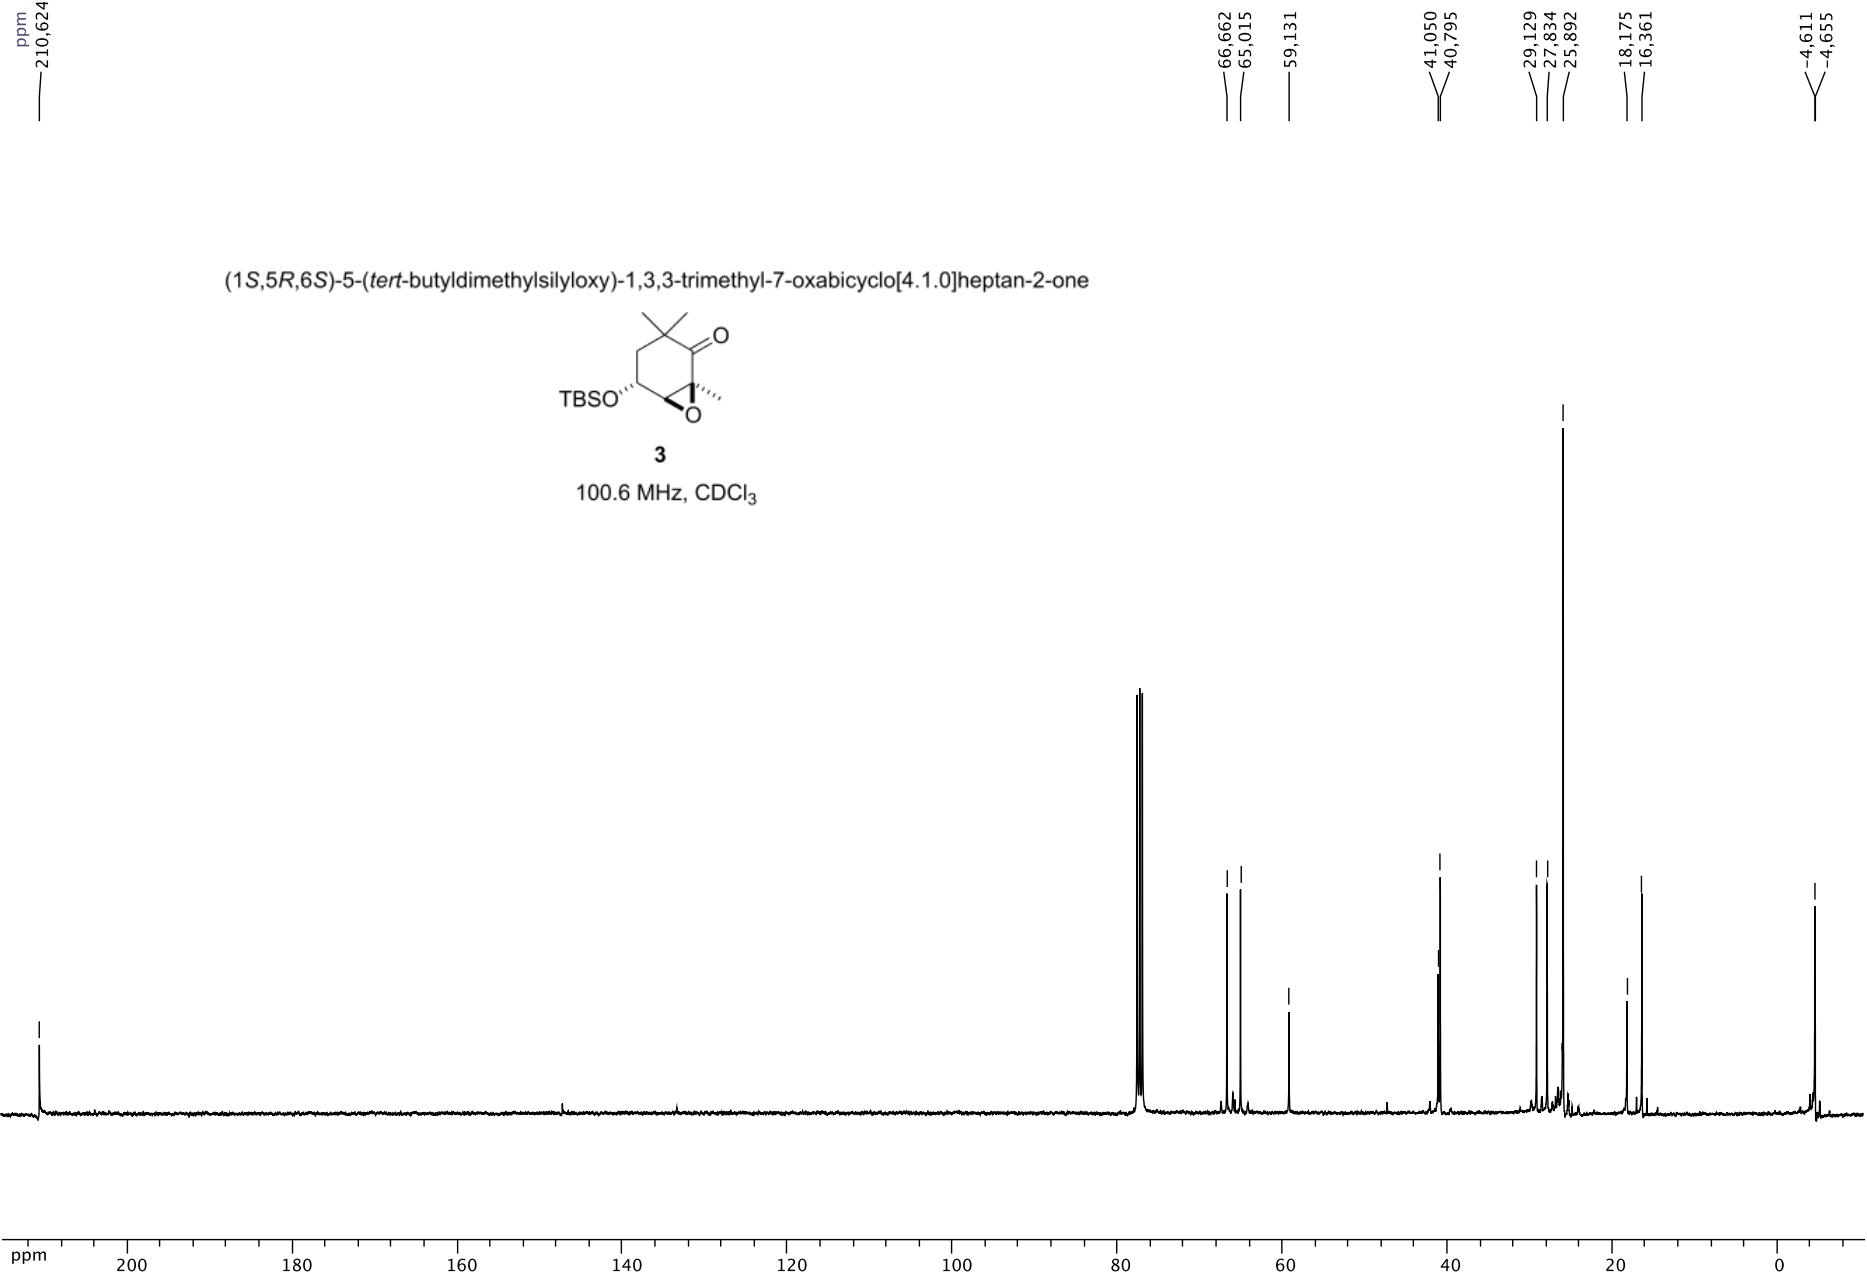

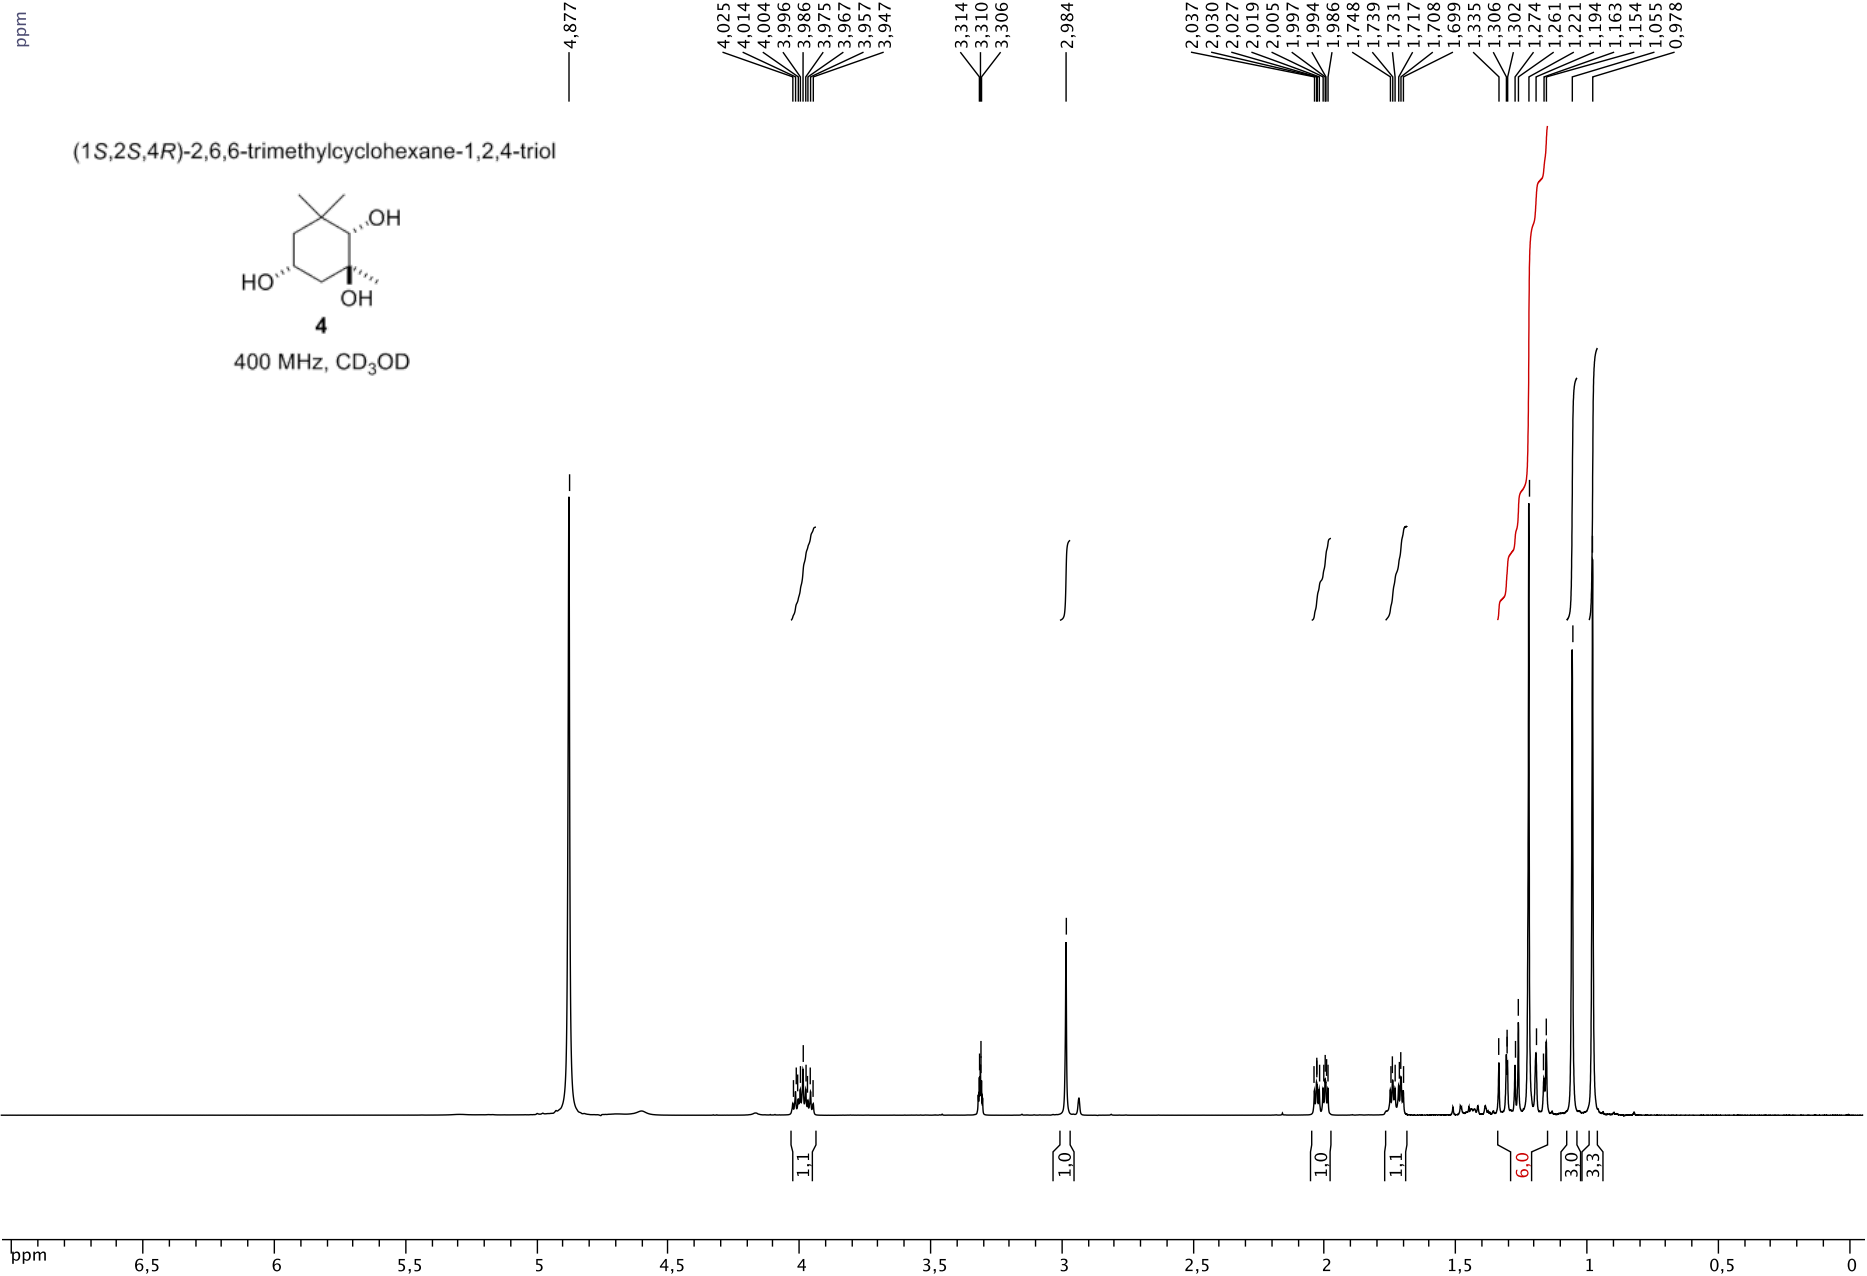

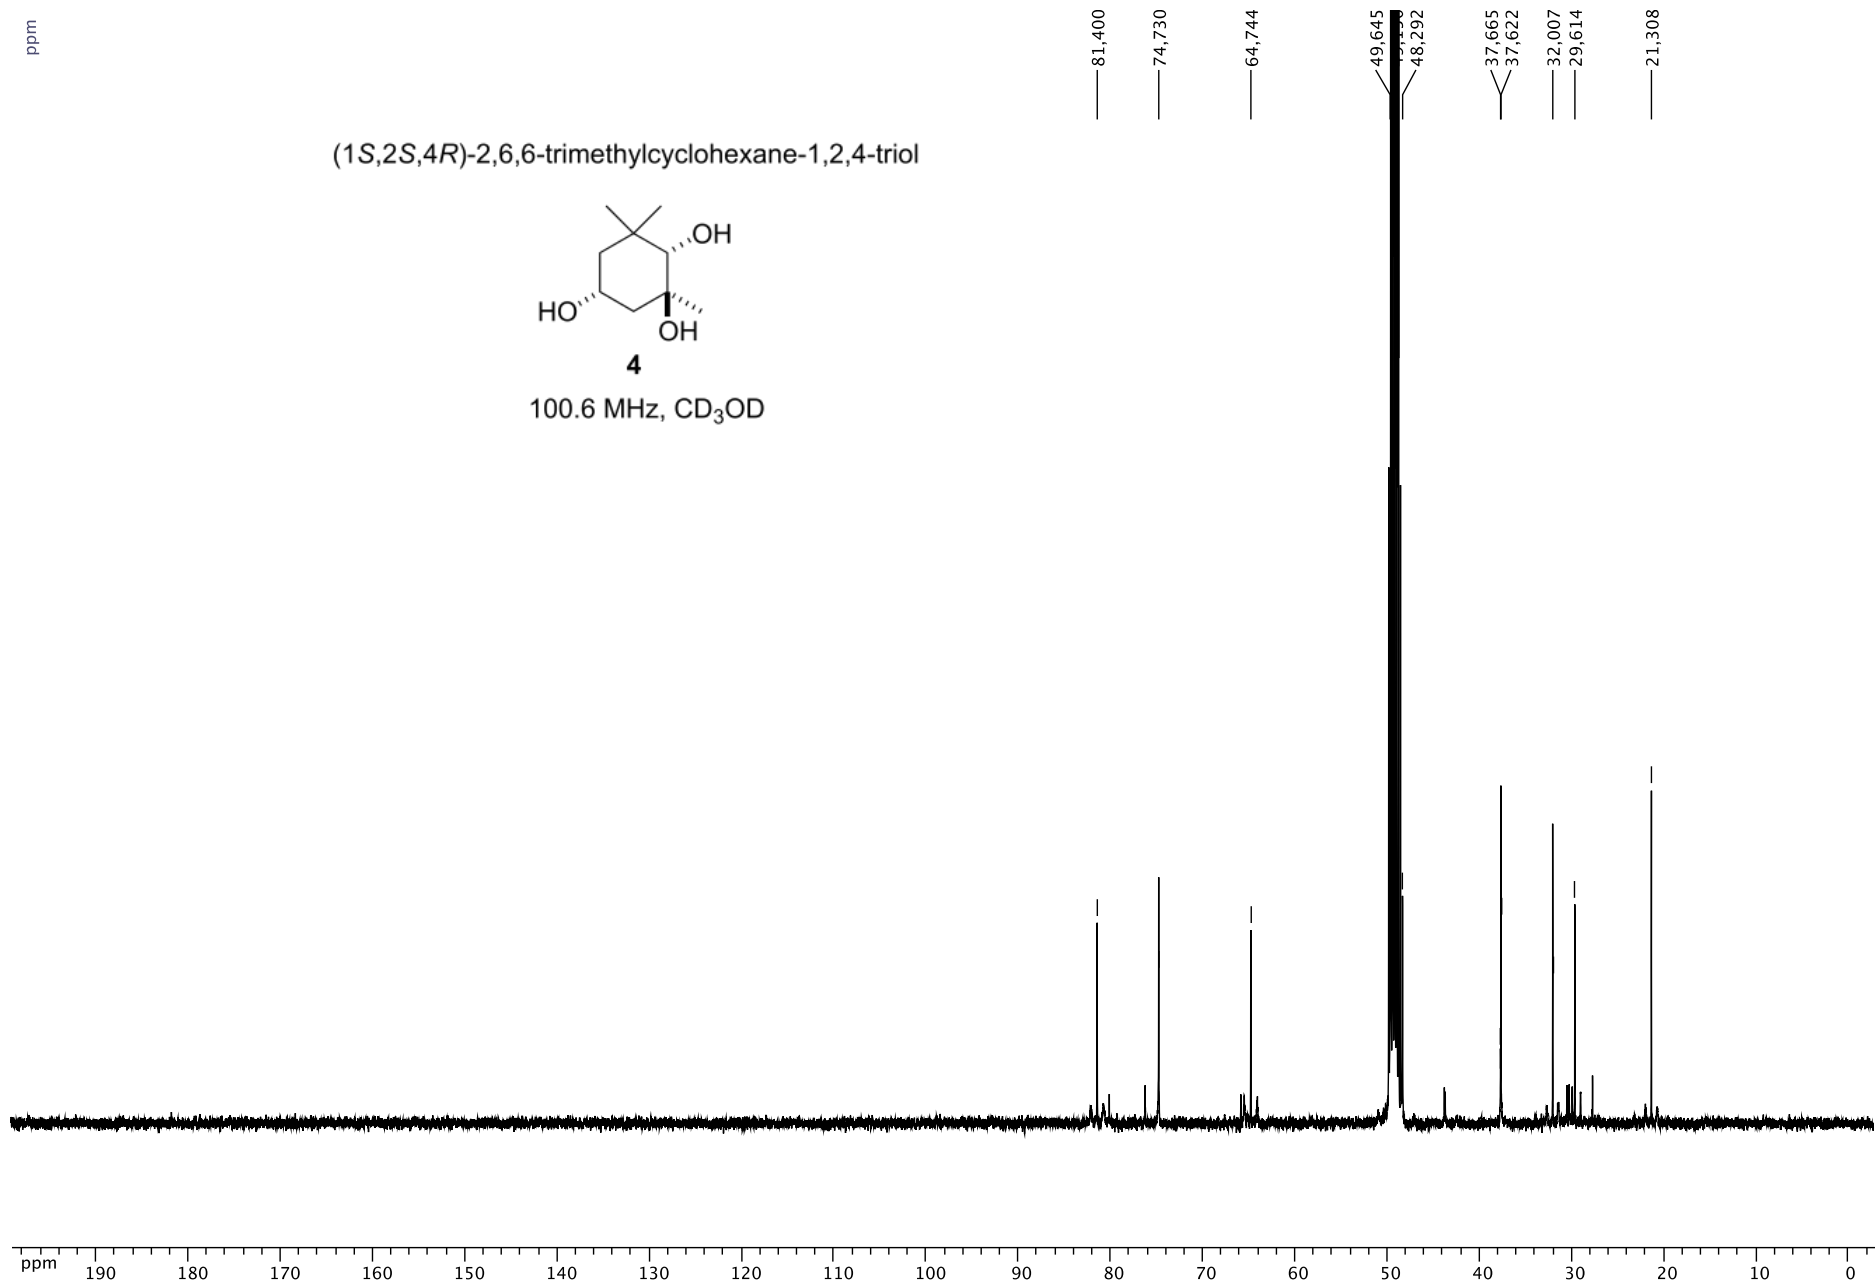

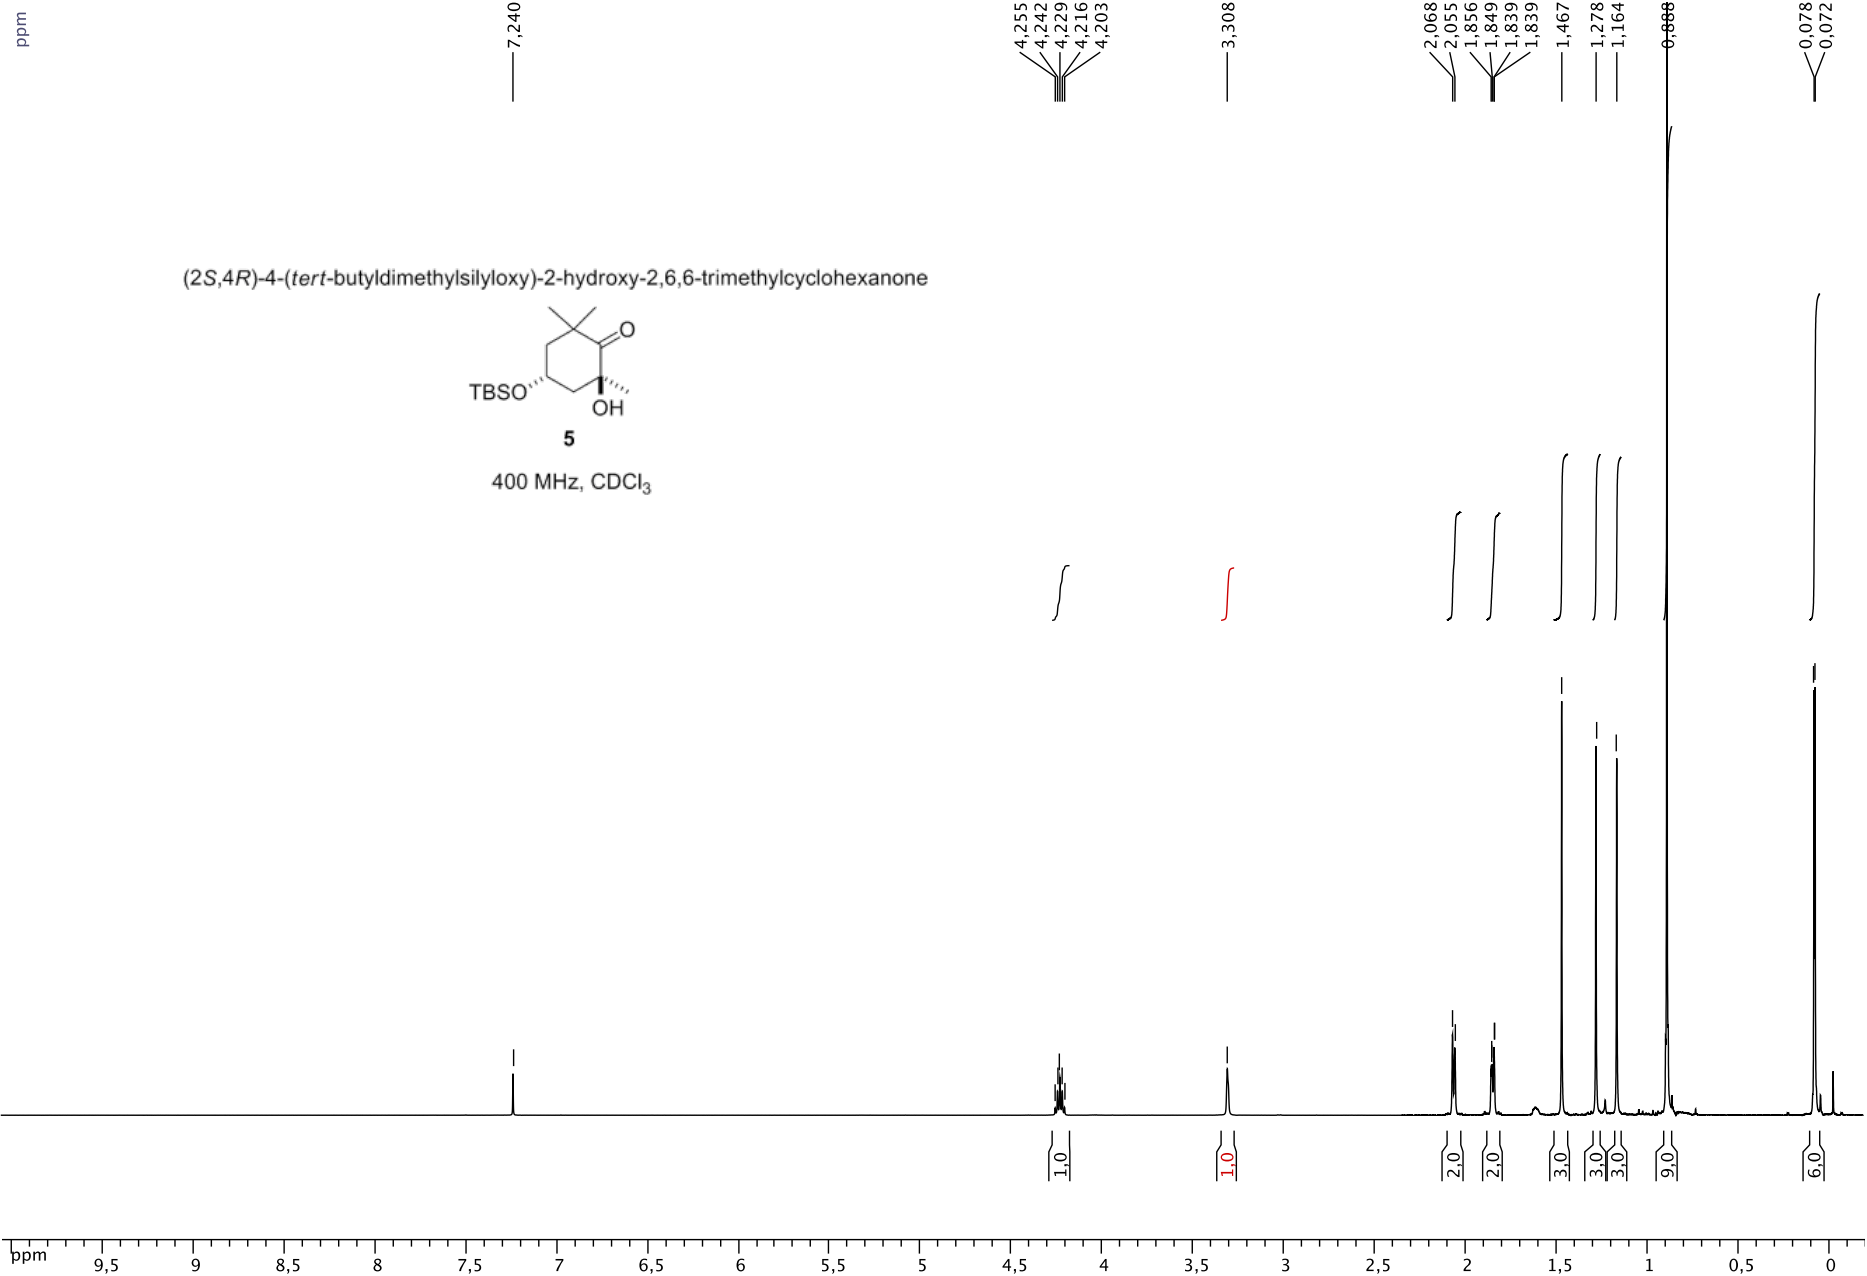

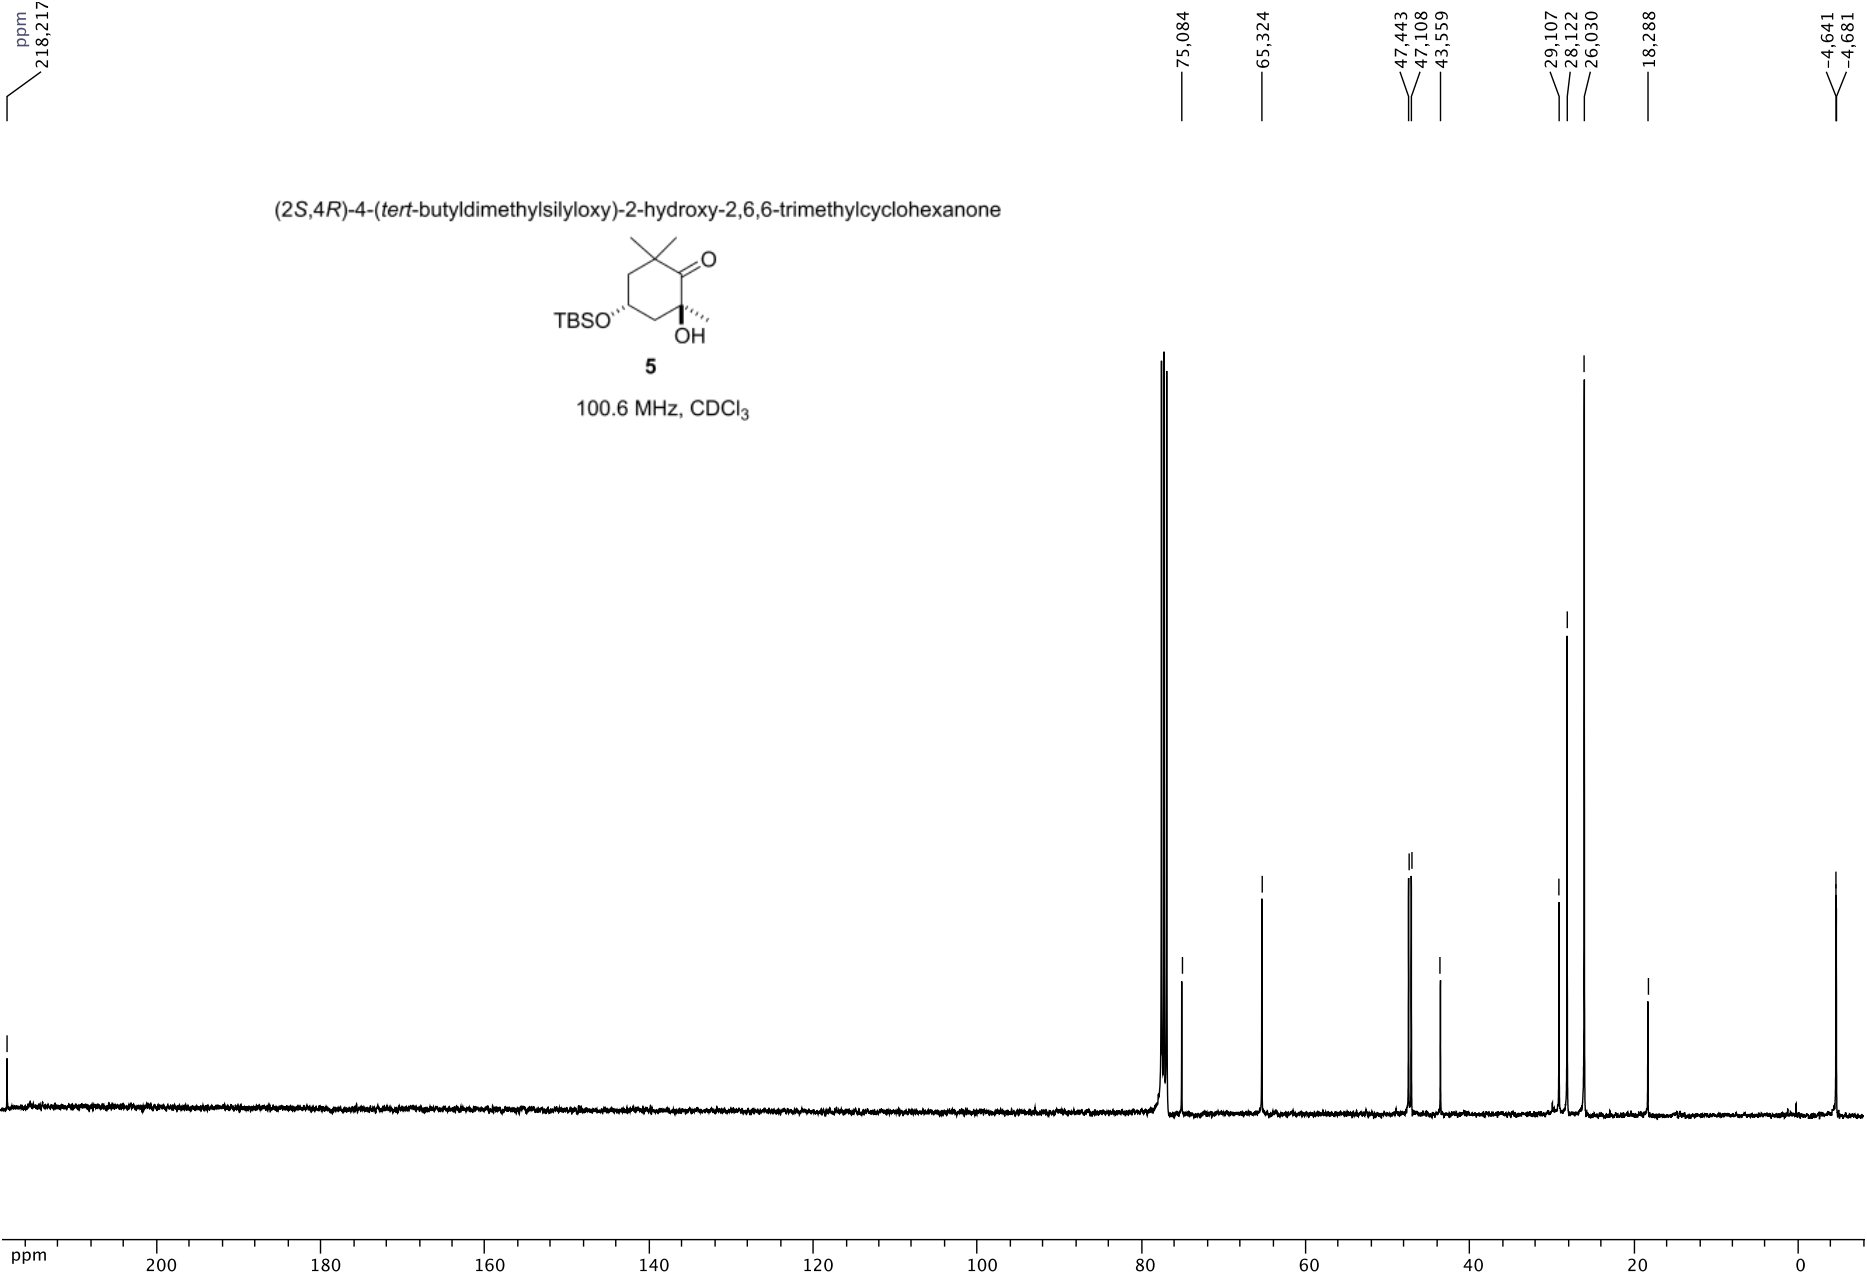

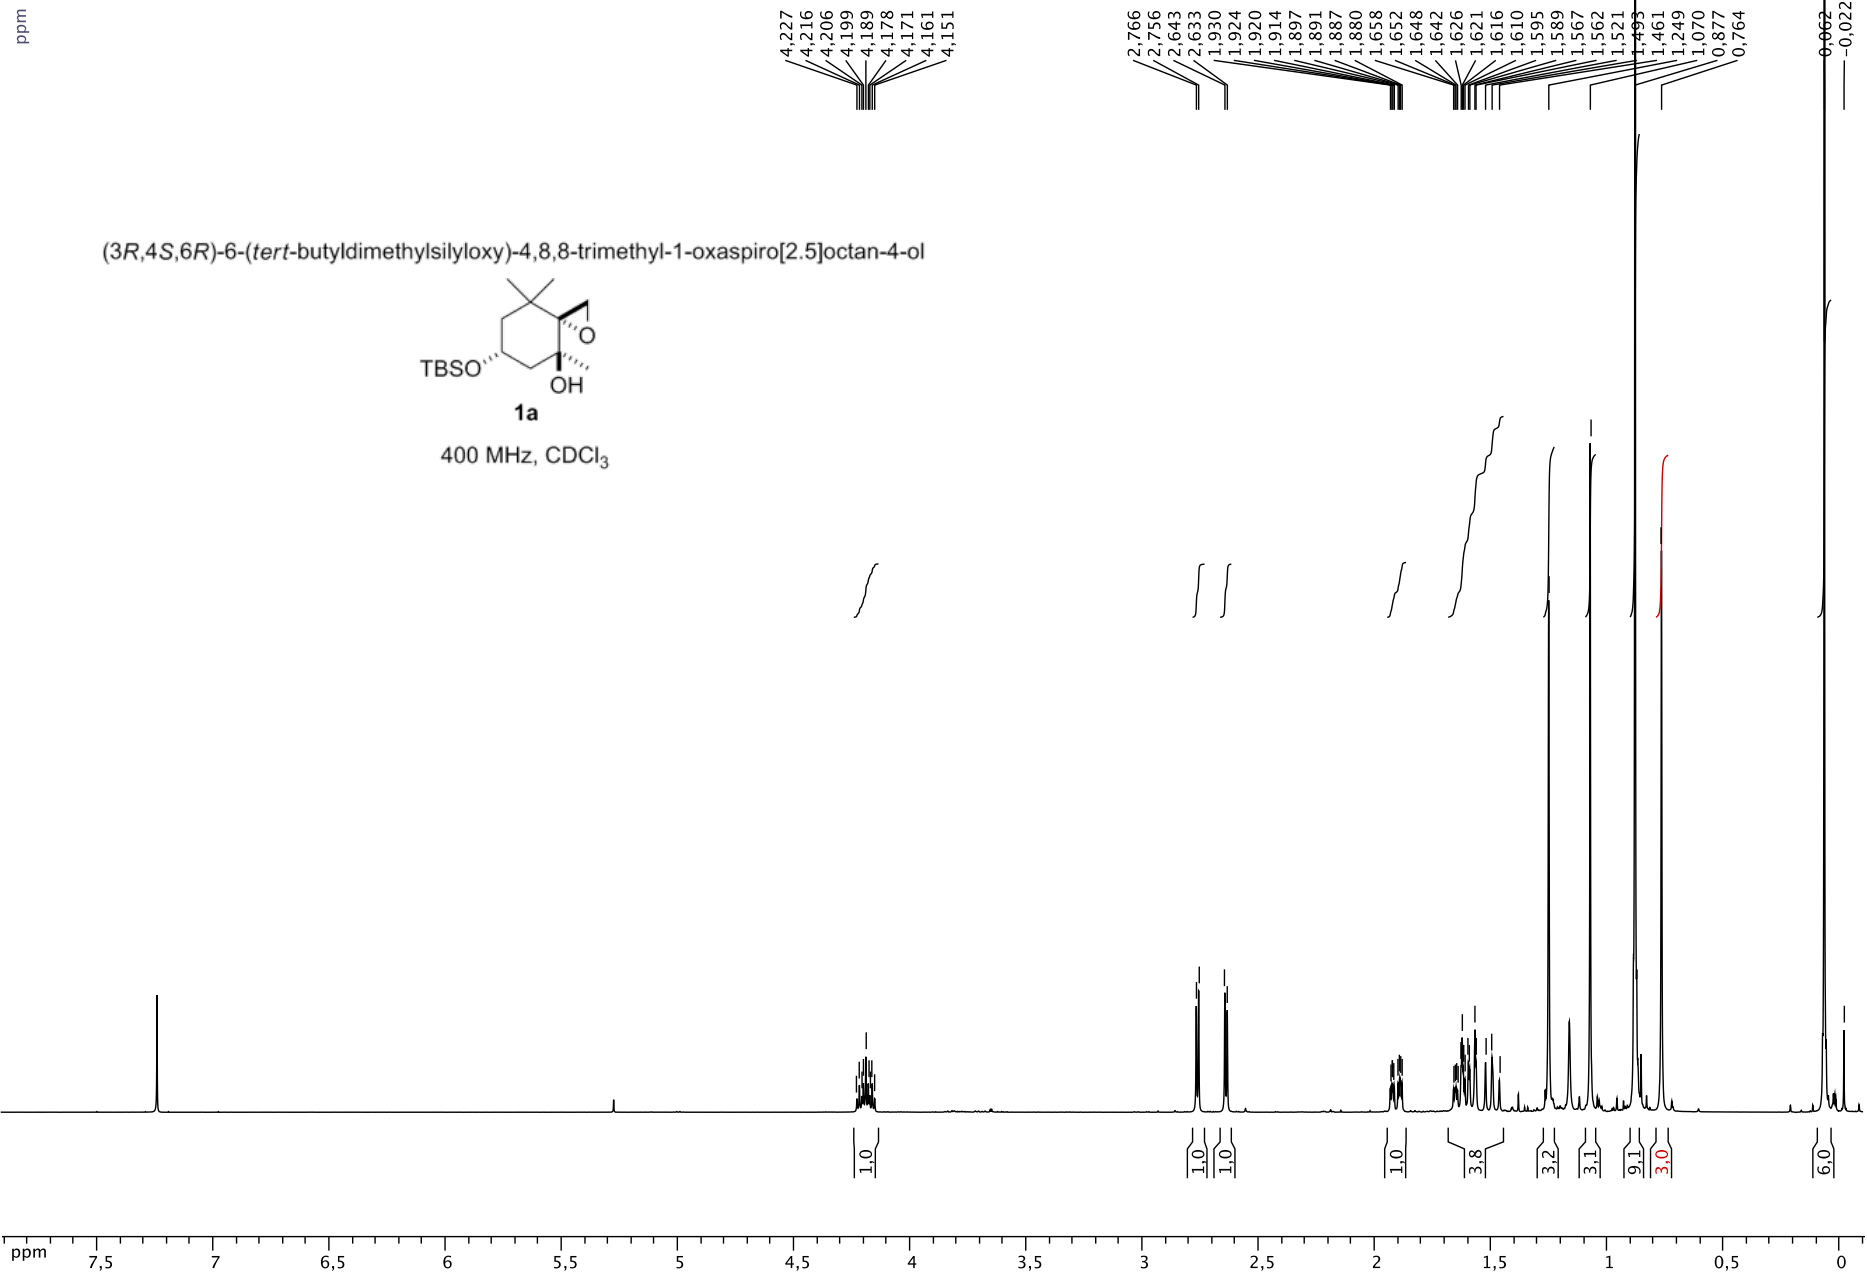

ppm

(3*R*,4*S*,6*R*)-6-(*tert*-butyldimethylsilyloxy)-4,8,8-trimethyl-1-oxaspiro[2.5]octan-4-ol

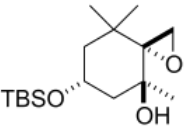

100.6 MHz, CDCl<sub>3</sub>

77.543  
77.230  
76.903  
75.579

64.800  
62.611

48.515  
48.377  
45.031

35.292

27.270  
26.317  
26.201  
26.128

18.396

-4.347  
-4.384

ppm 170 160 150 140 130 120 110 100 90 80 70 60 50 40 30 20 10 0

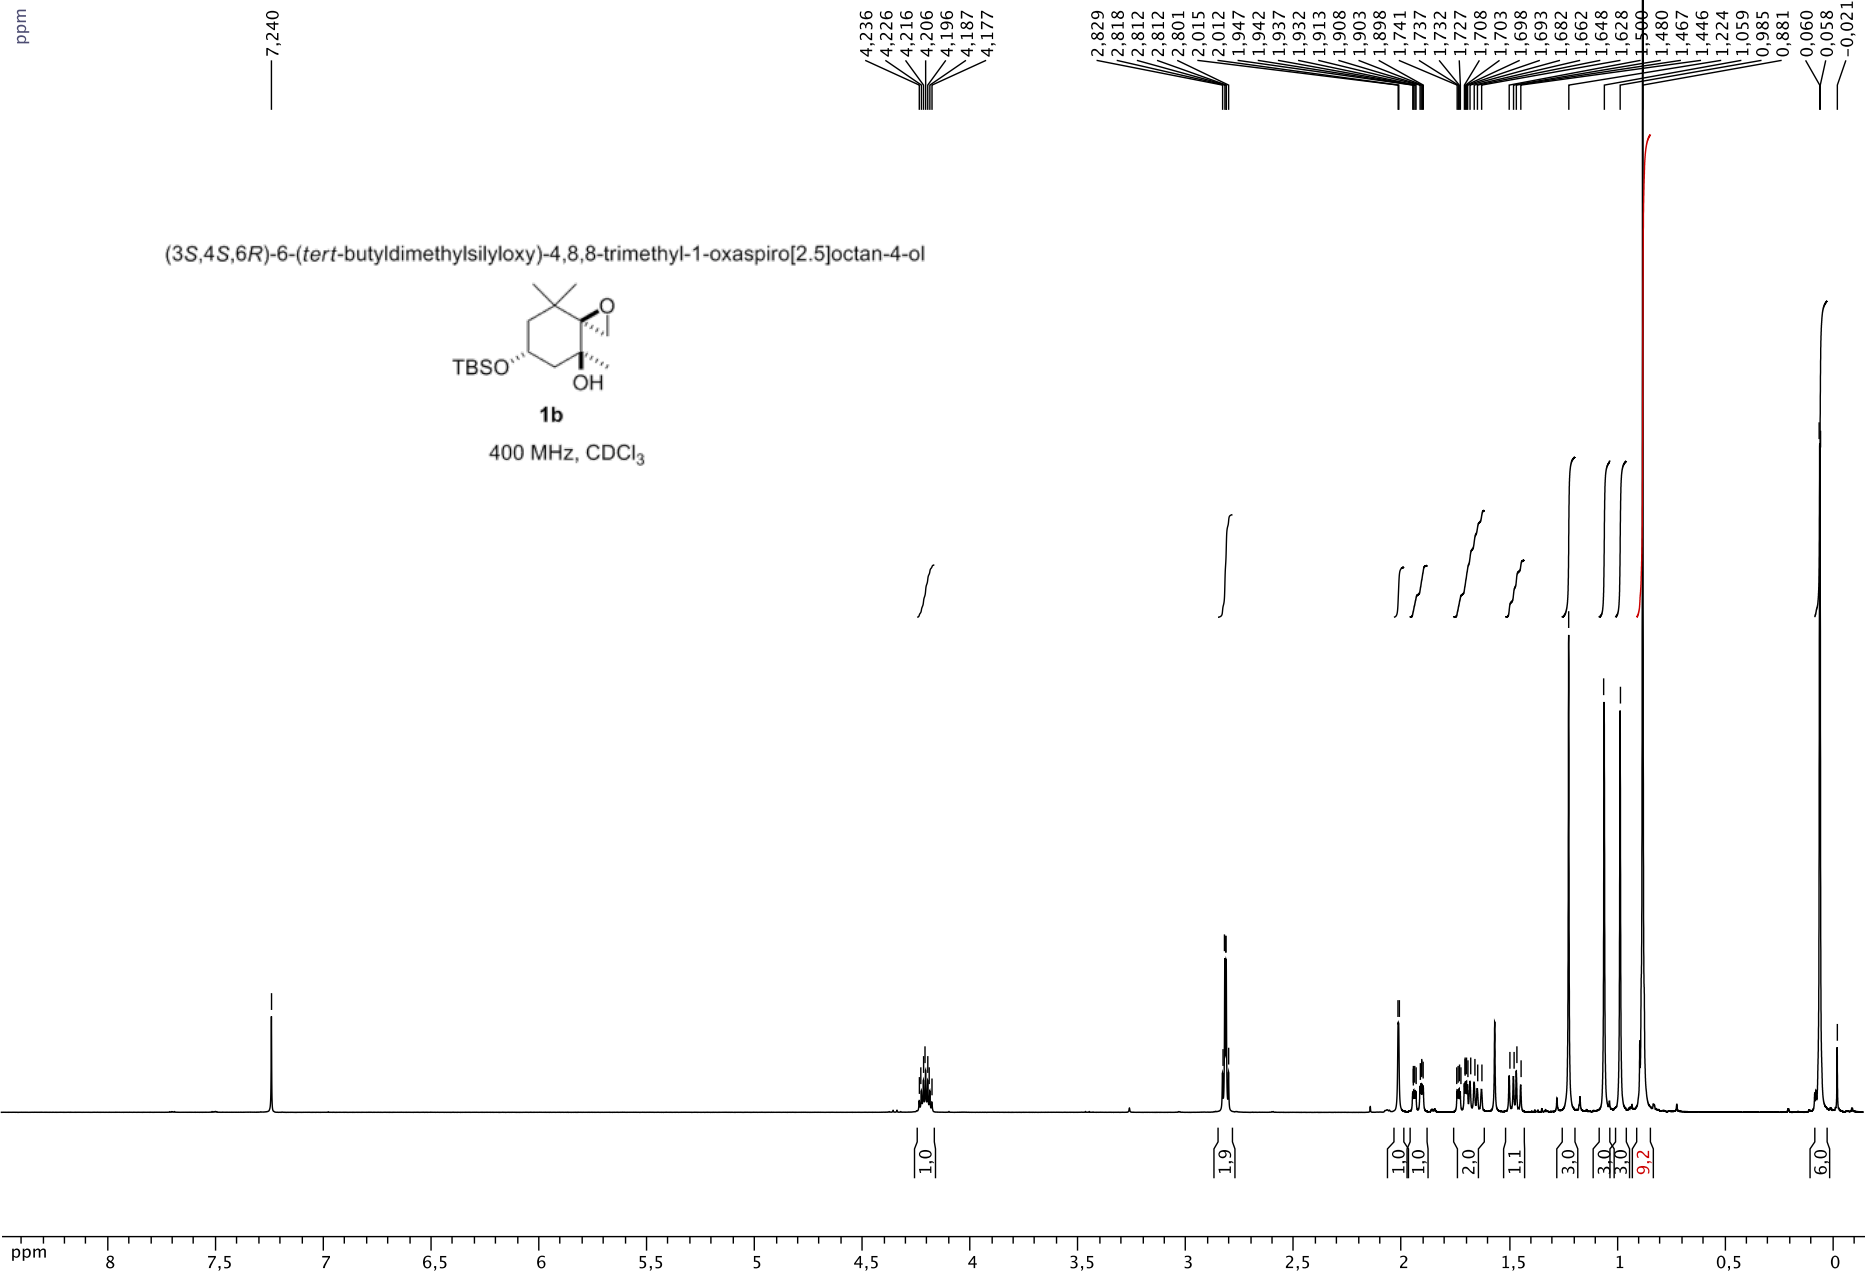

ppm

77.230

72.025

65.904  
65.809

49.505  
47.619  
47.472

34.700

28.586  
27.209  
26.257  
26.088

18.319

-4.582

(3*S*,4*S*,6*R*)-6-(*tert*-butyldimethylsilyloxy)-4,8,8-trimethyl-1-oxaspiro[2.5]octan-4-ol

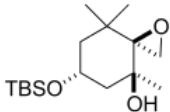

**1b**

100.6 MHz, CDCl<sub>3</sub>

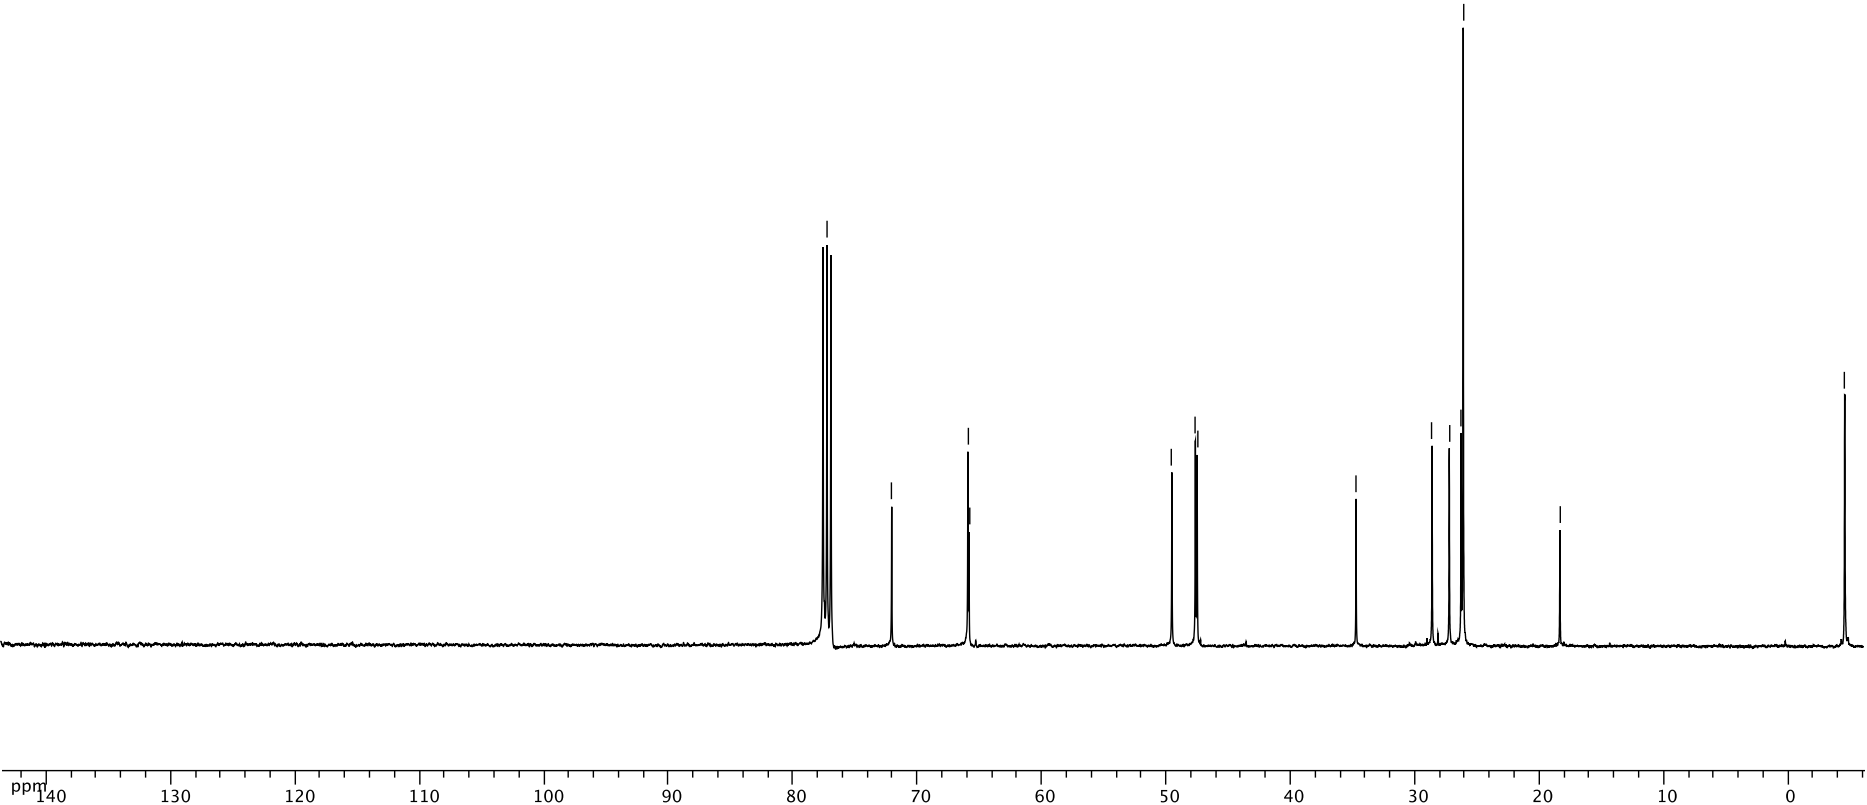

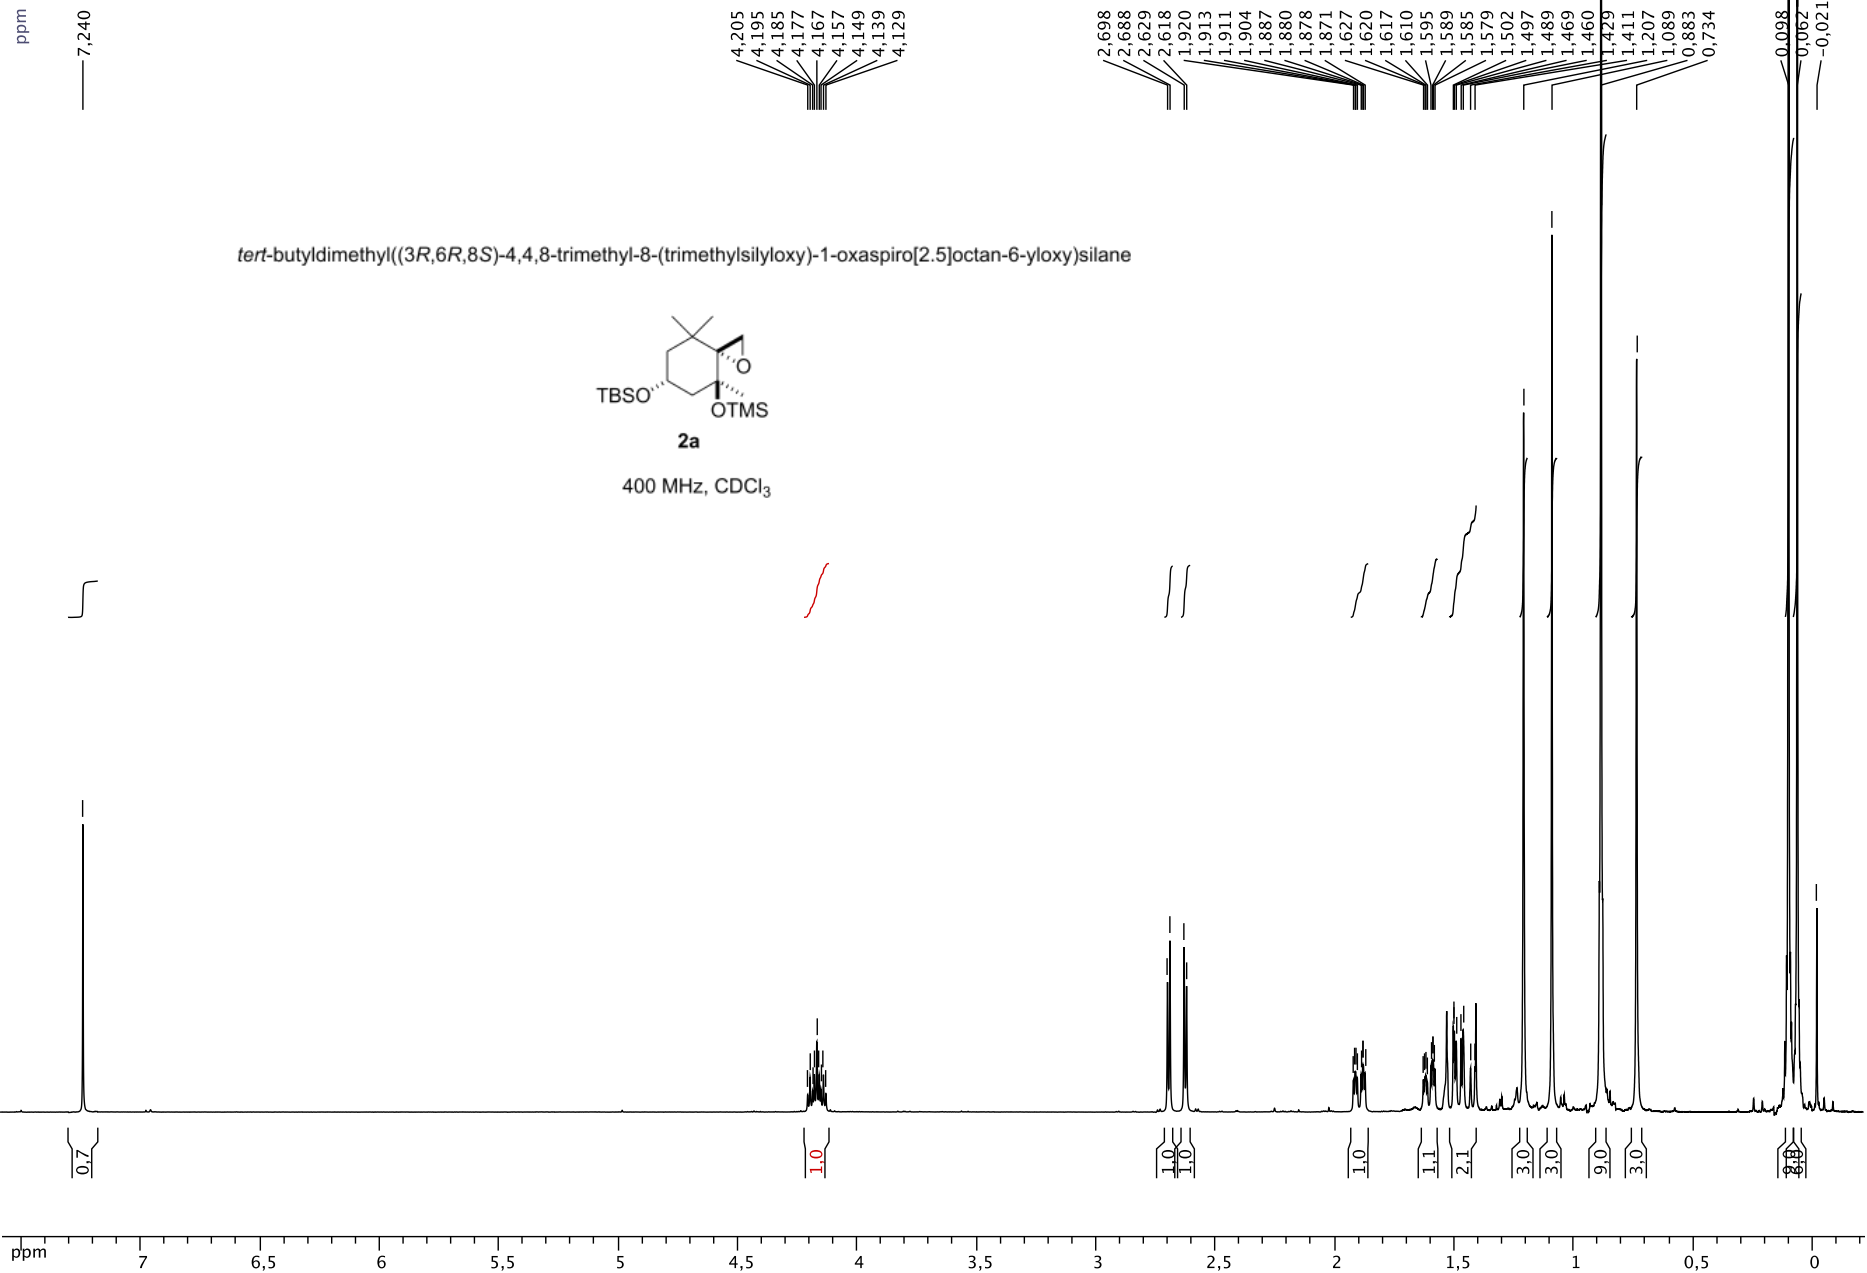

ppm

78,252  
77,230  
65,176  
62,601  
49,903  
48,522  
45,636  
35,446  
27,550  
26,462  
26,180  
24,630  
18,448  
2,709  
-4,257  
-4,327

*tert*-butyldimethyl((3*R*,6*R*,8*S*)-4,4,8-trimethyl-8-(trimethylsilyloxy)-1-oxaspiro[2.5]octan-6-yloxy)silane

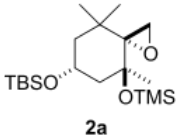

100.6 MHz, CDCl<sub>3</sub>

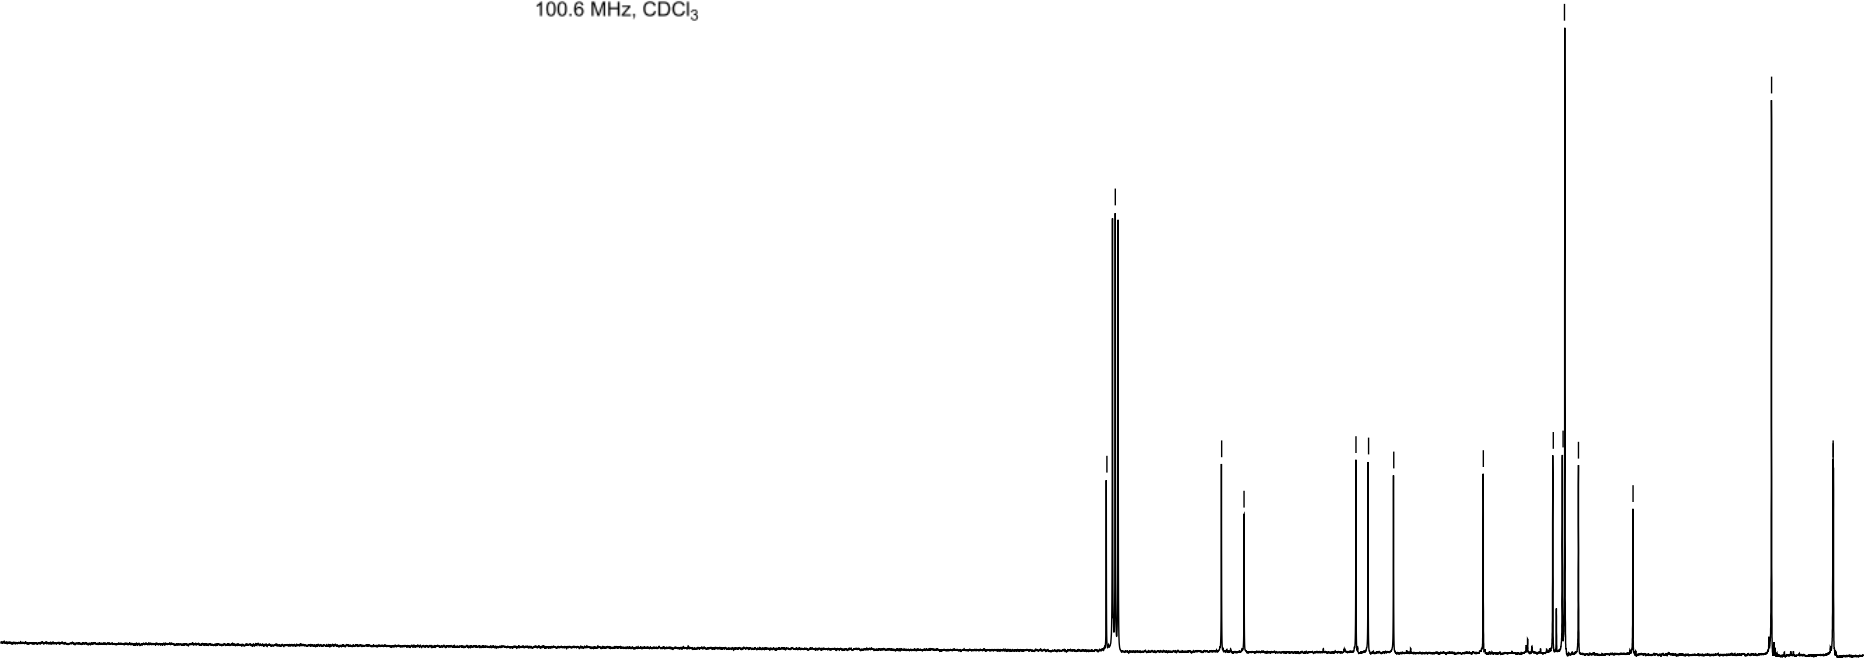

ppm 190 180 170 160 150 140 130 120 110 100 90 80 70 60 50 40 30 20 10 0

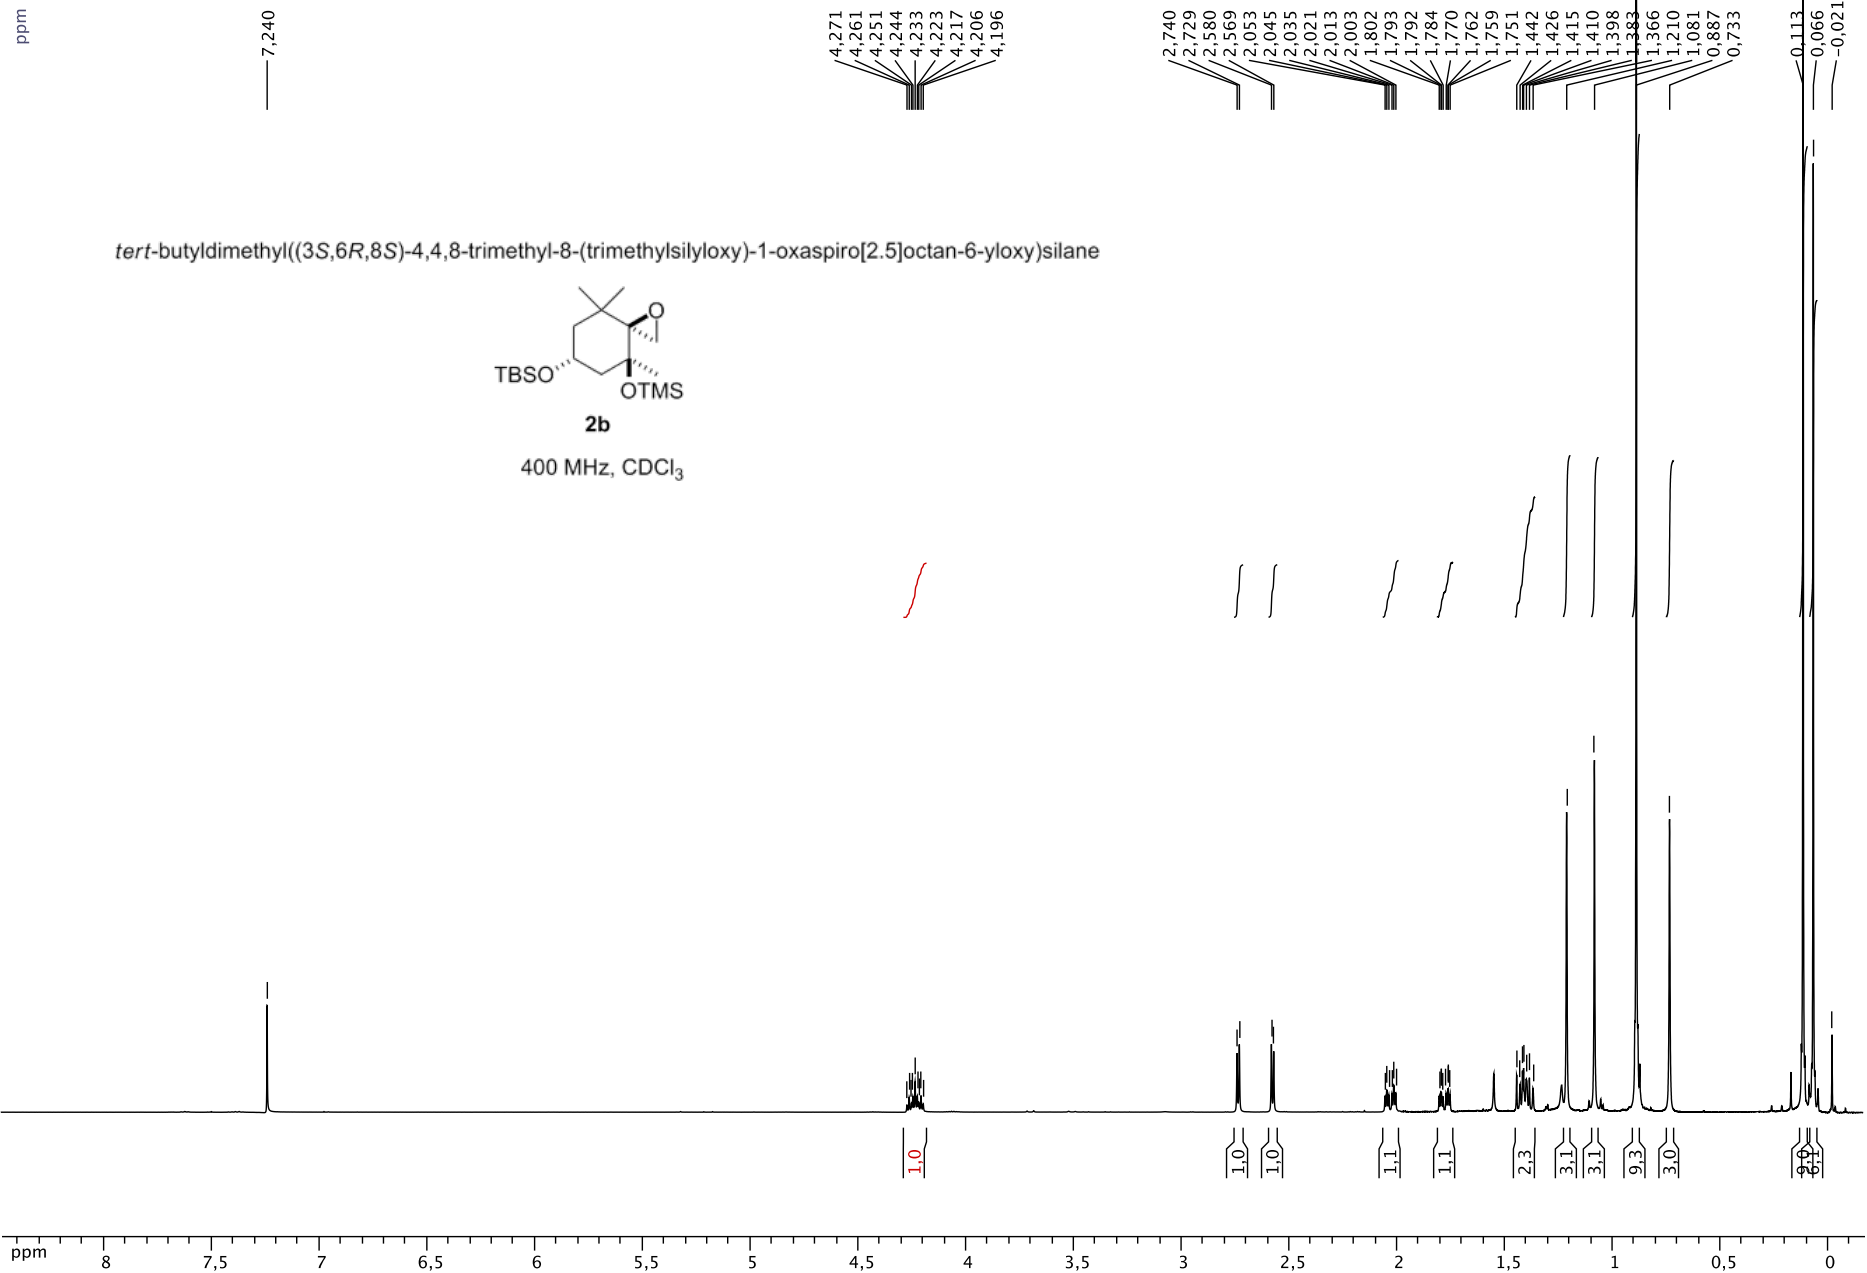

ppm

*tert*-butyldimethyl((3*S*,6*R*,8*S*)-4,4,8-trimethyl-8-(trimethylsilyloxy)-1-oxaspiro[2.5]octan-6-yloxy)silane

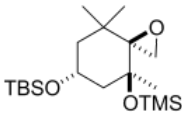

**2b**

100.6 MHz, CDCl<sub>3</sub>

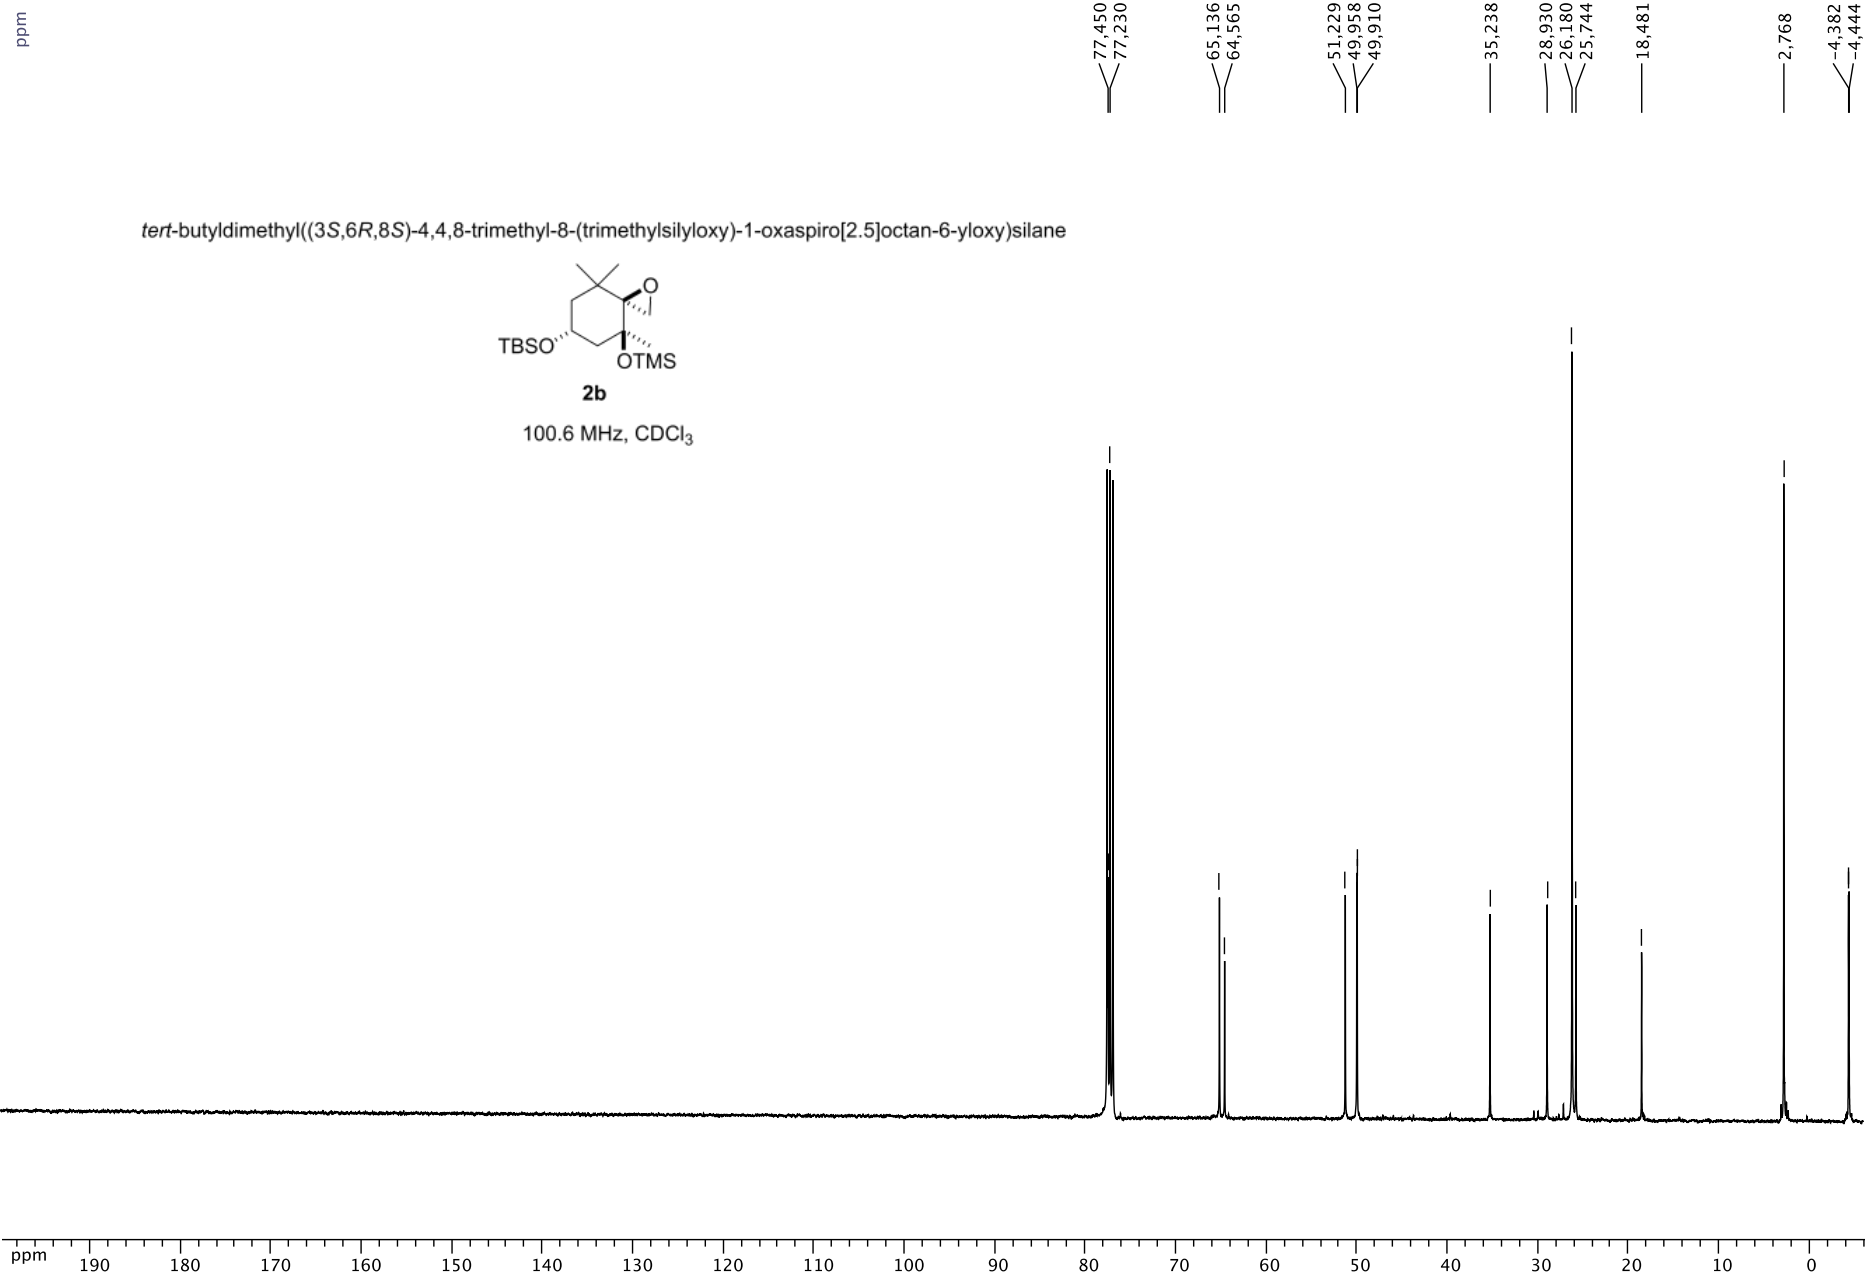

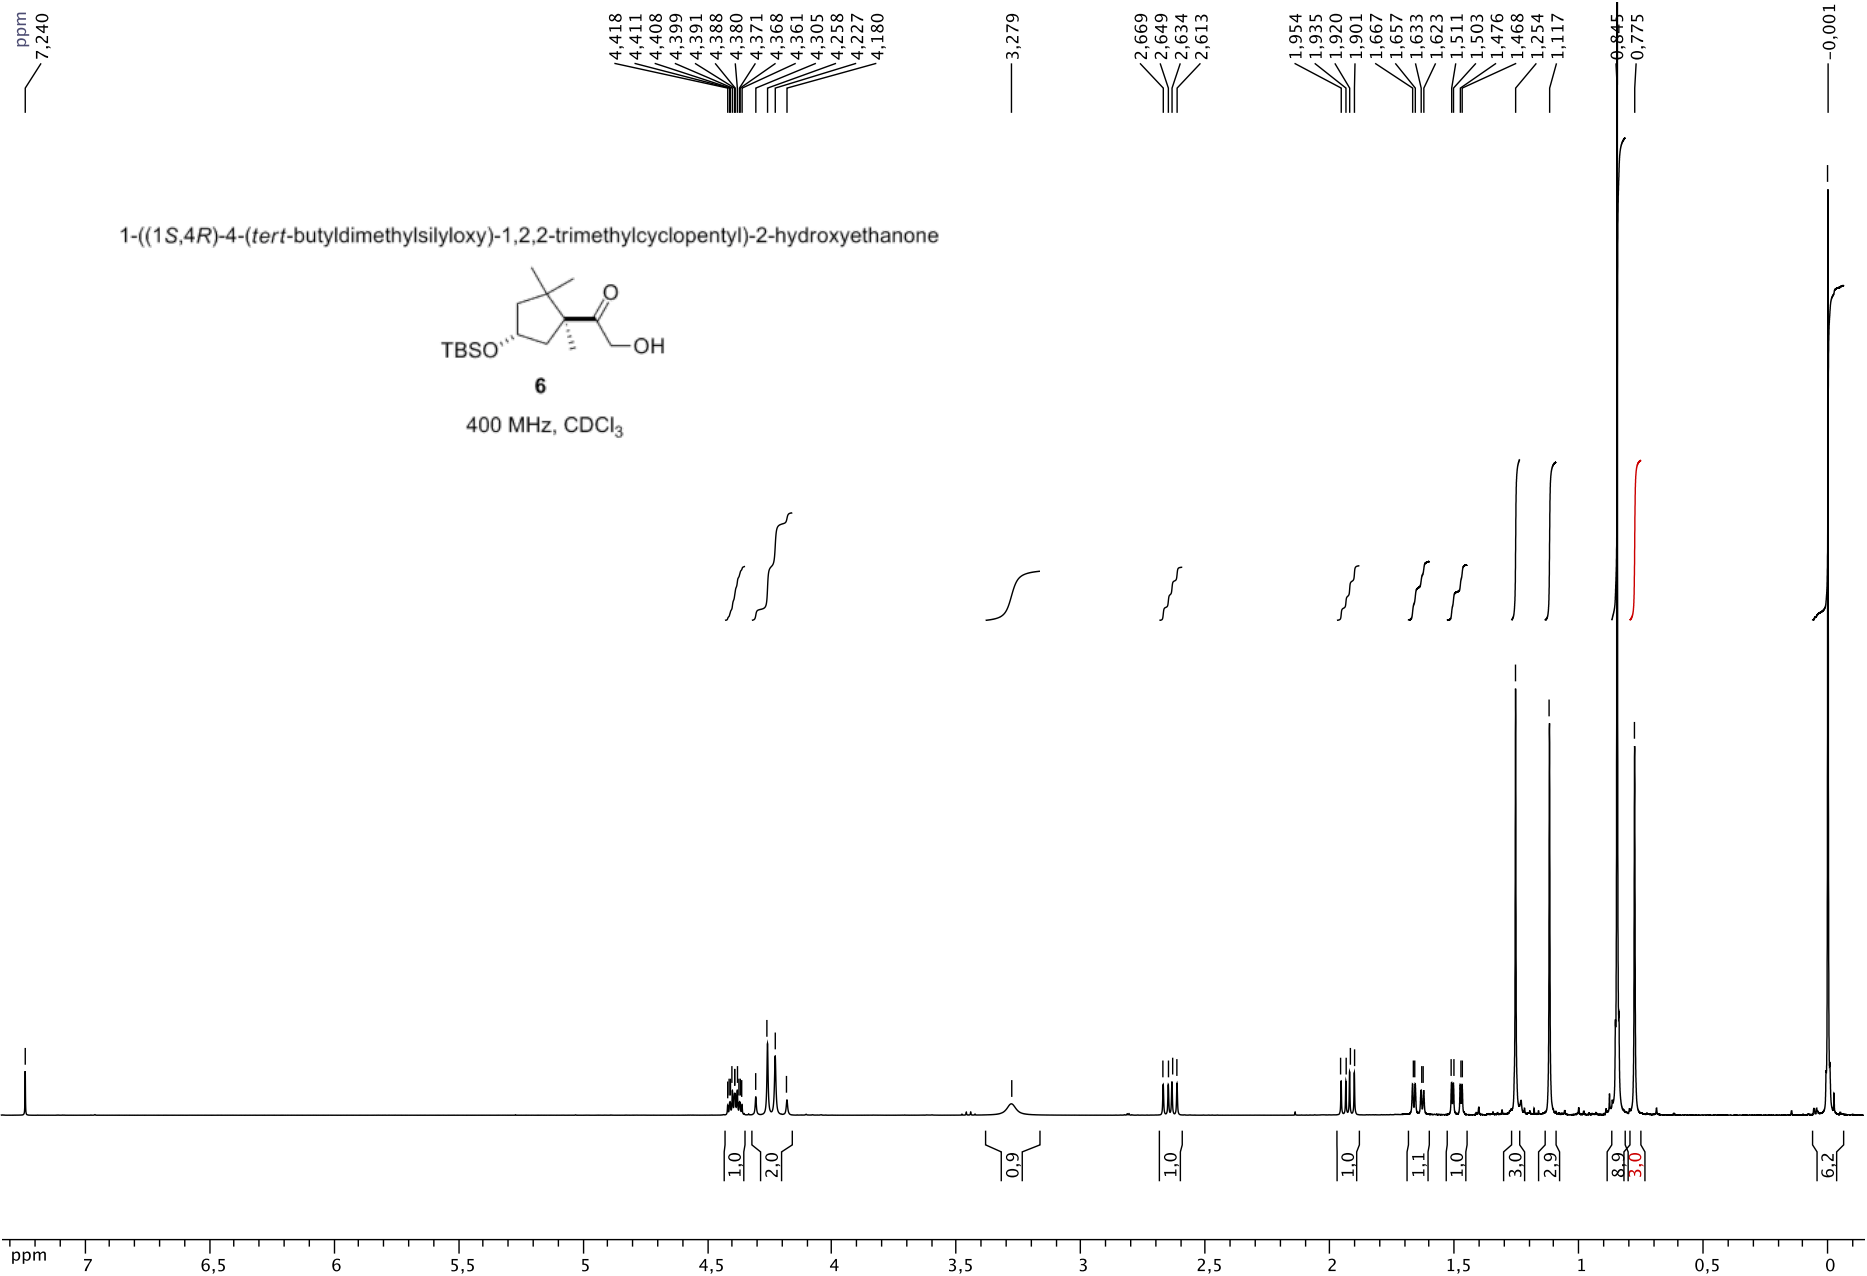

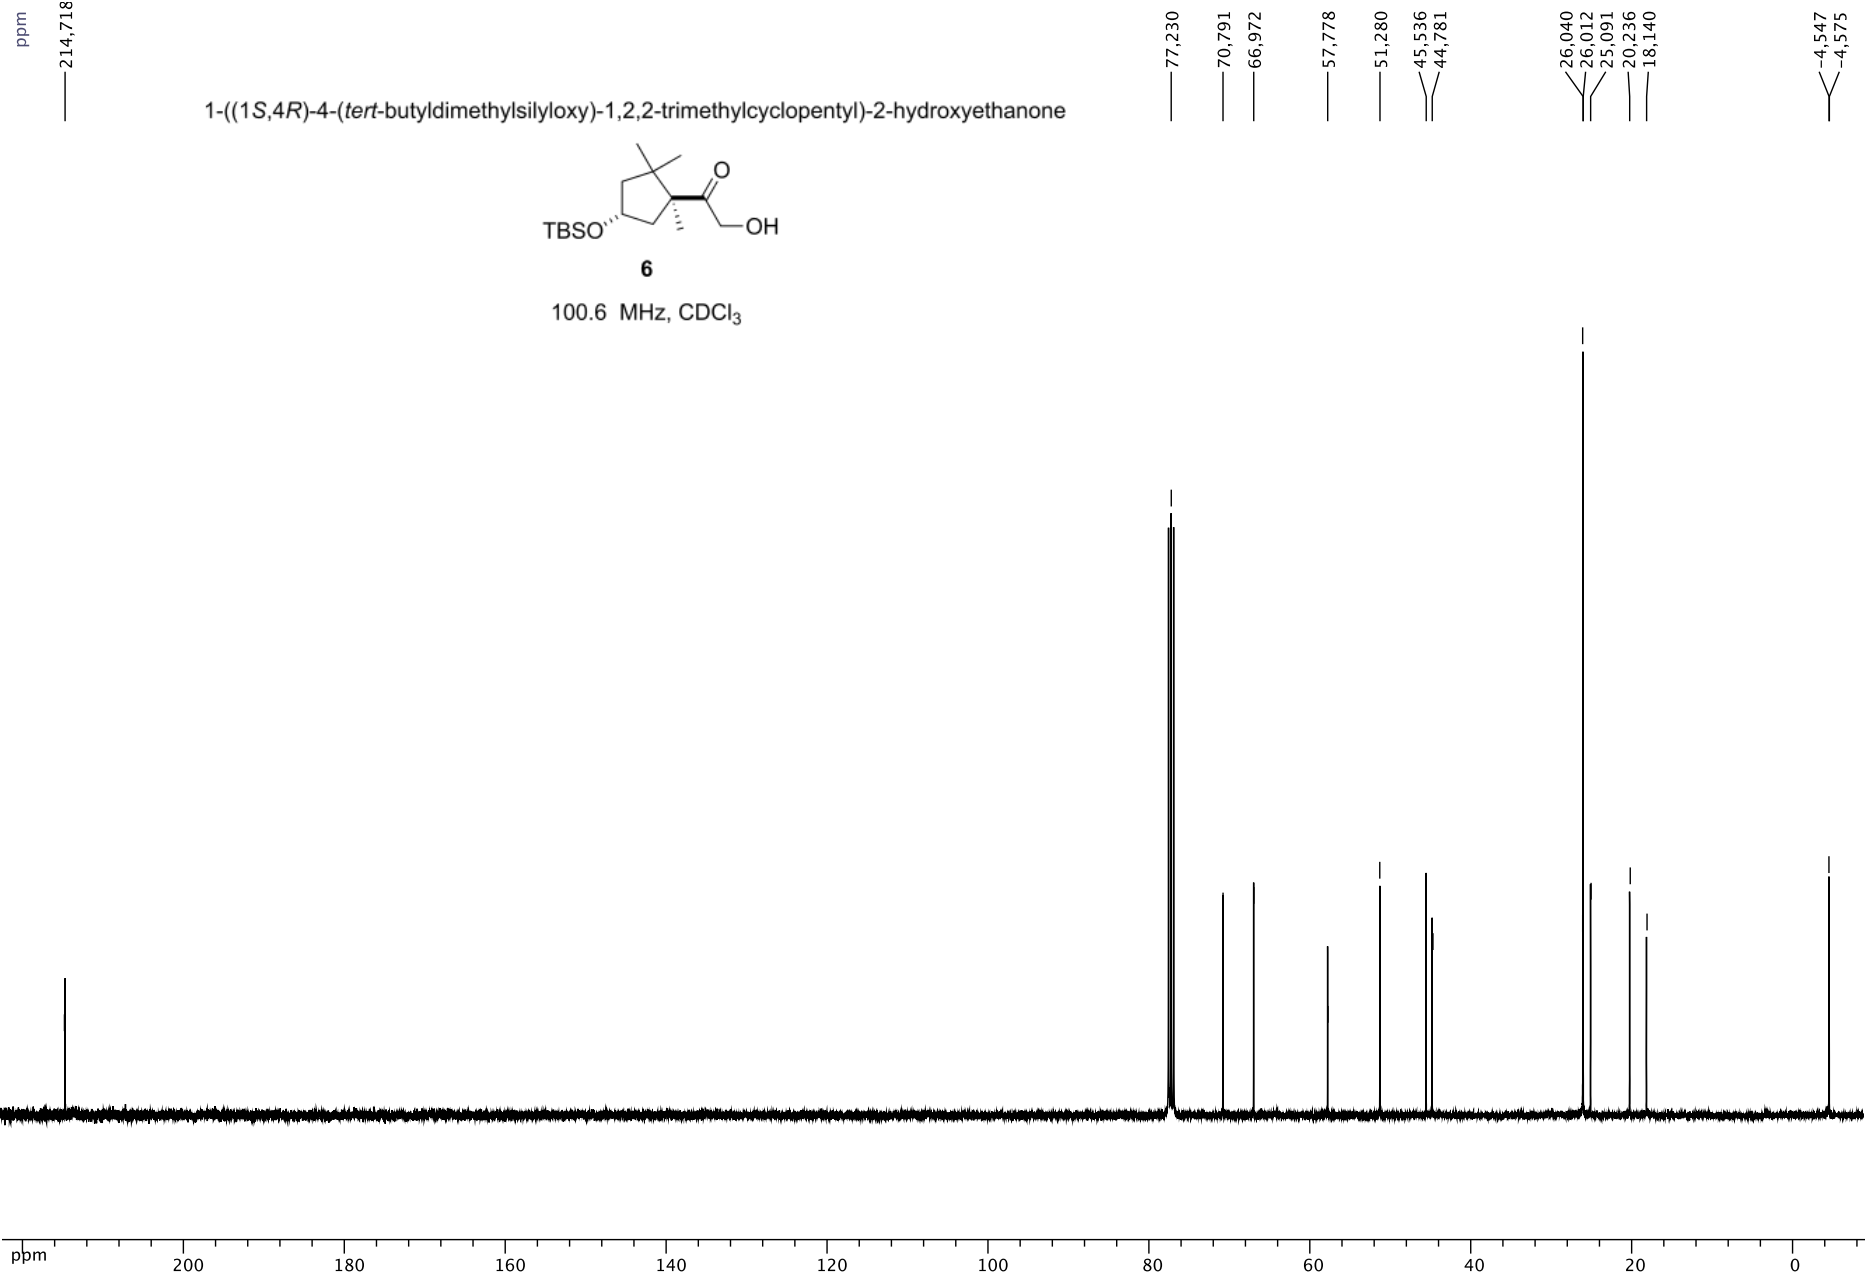



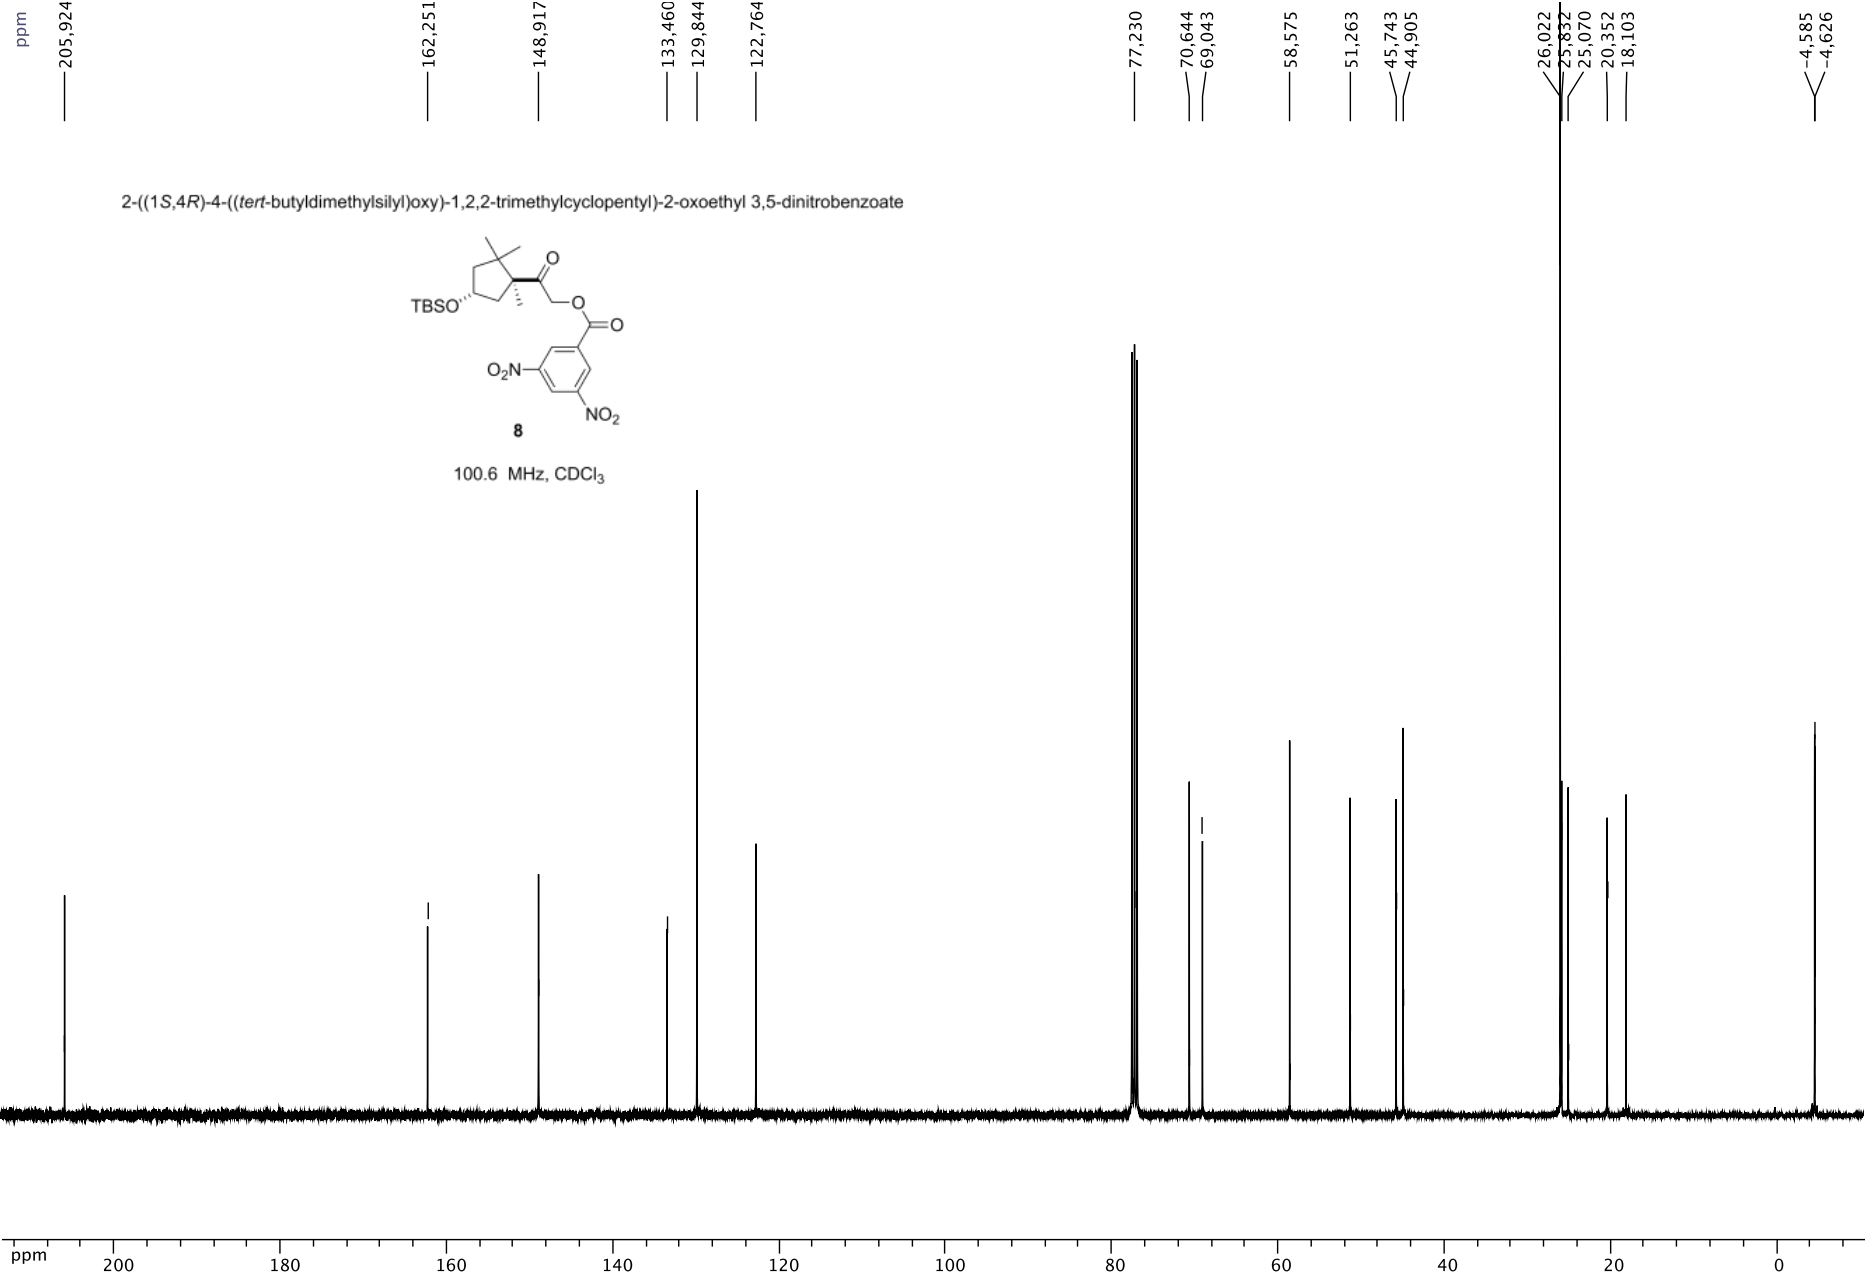

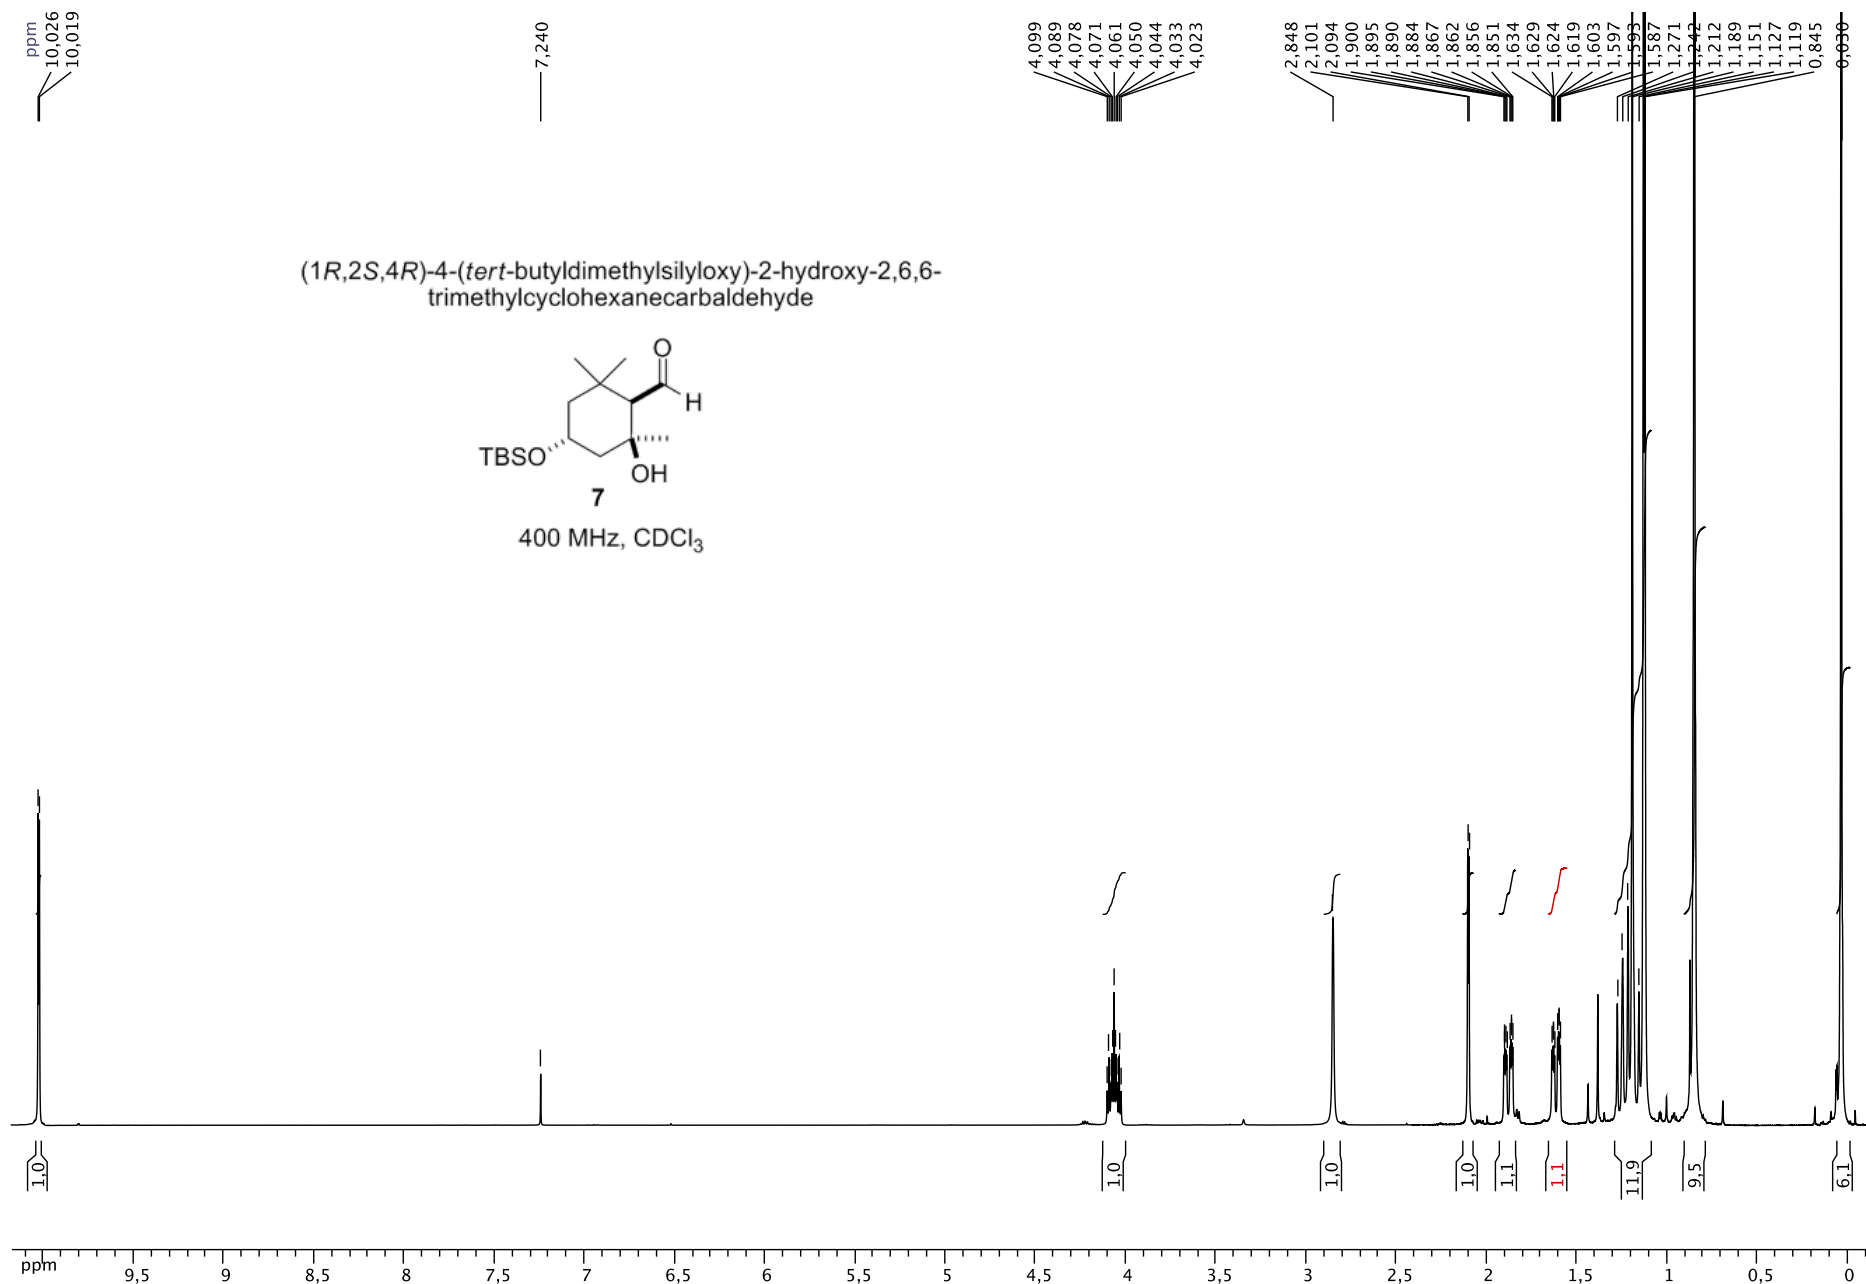

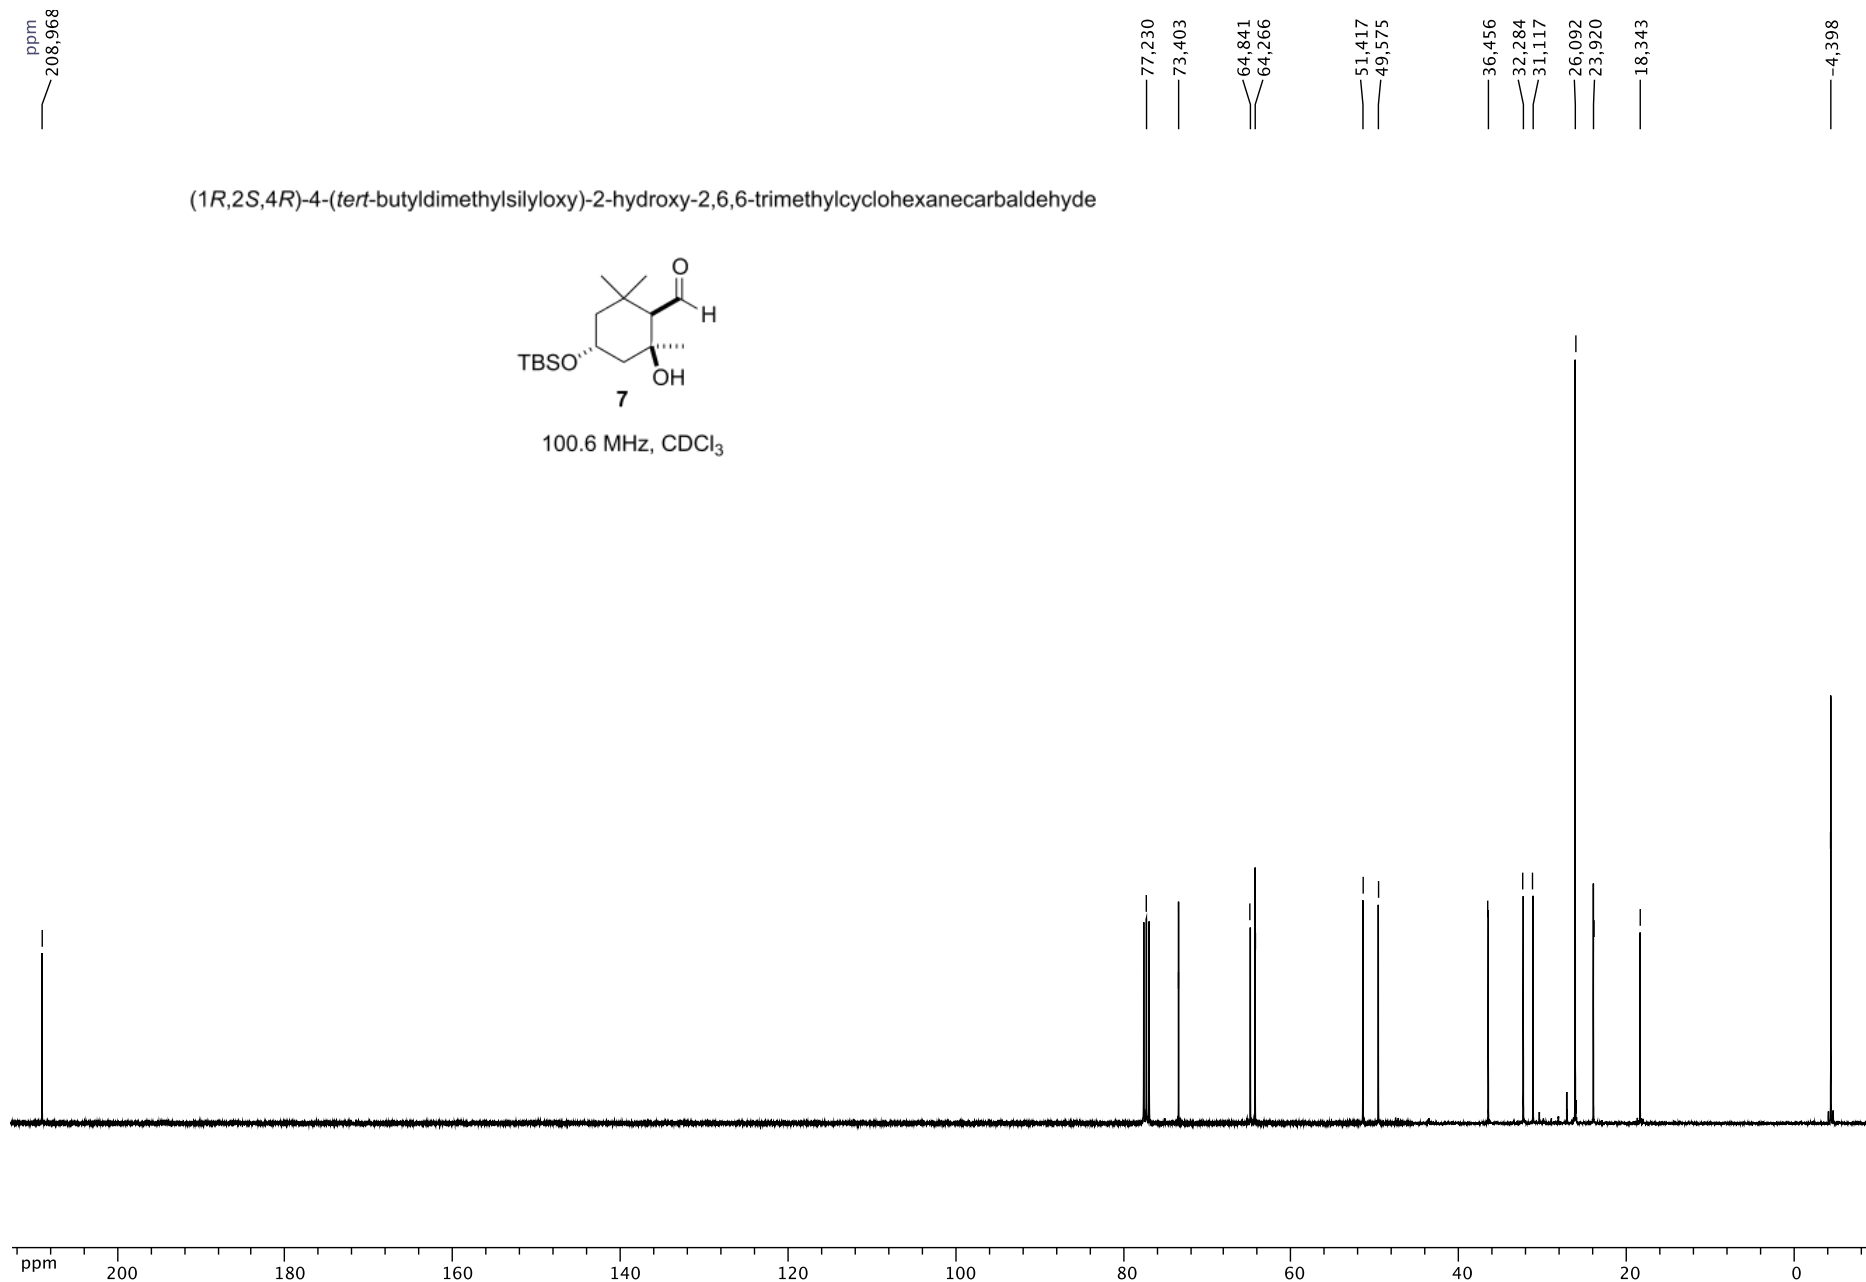

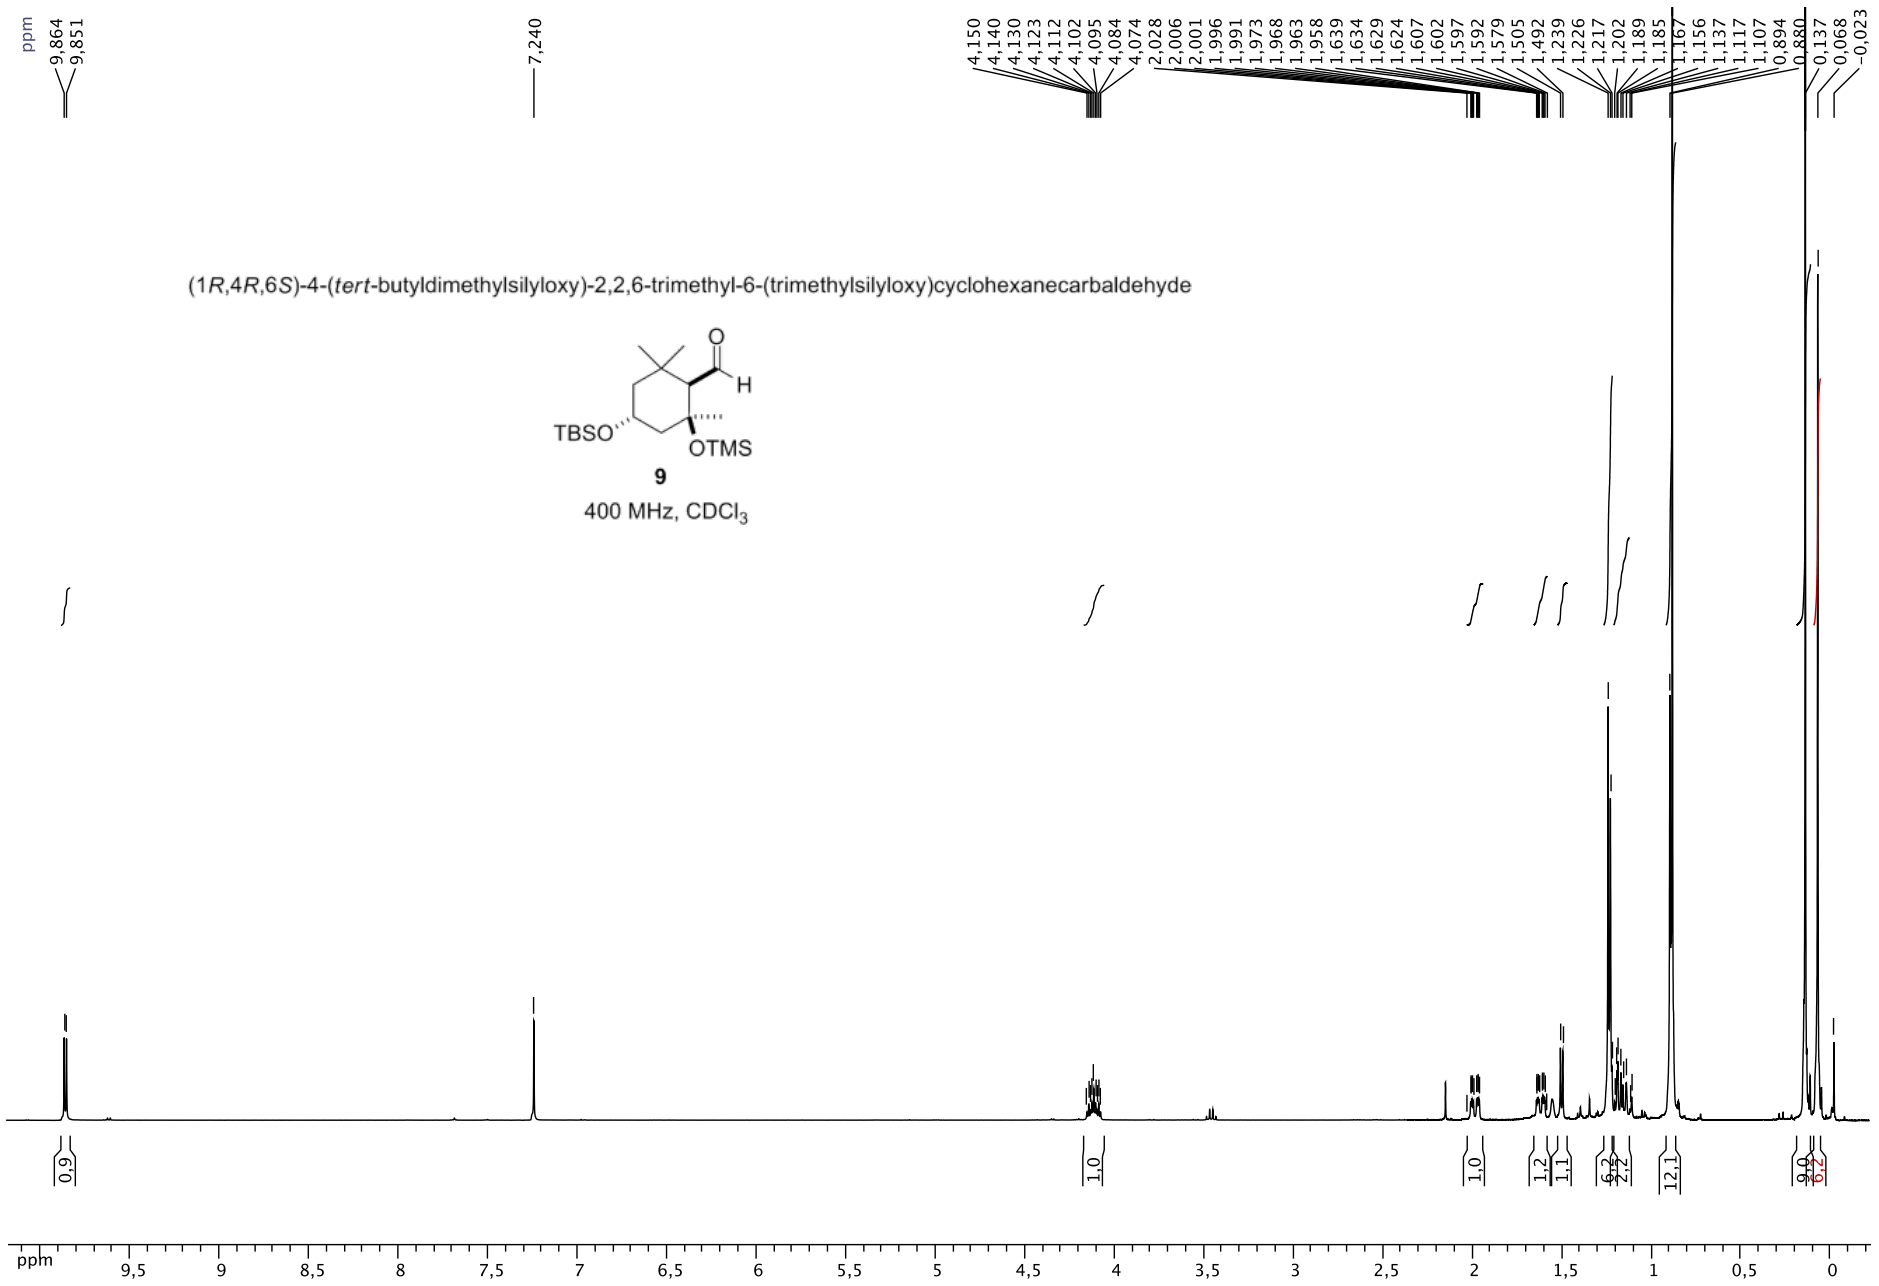

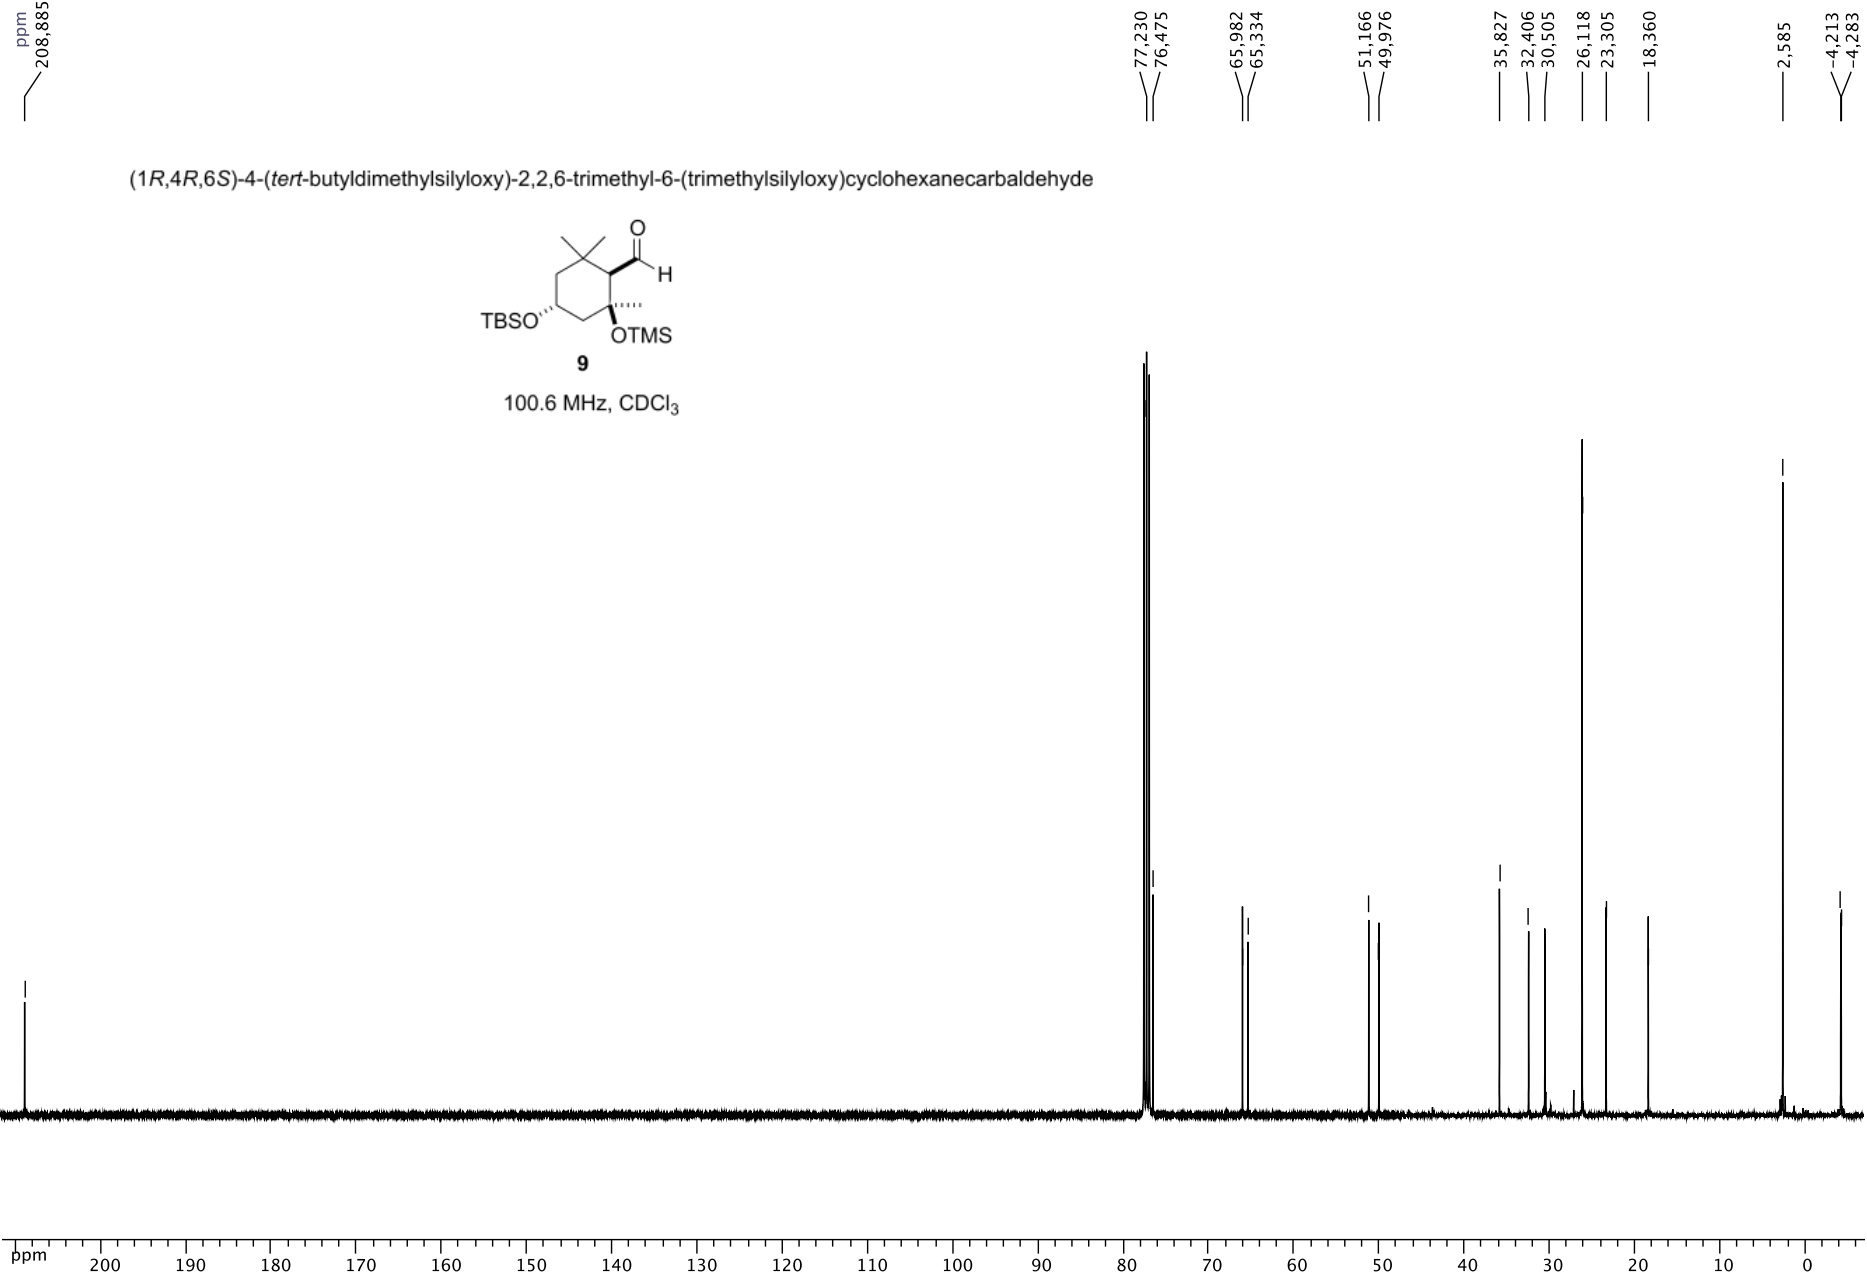

Supplement: c1ob06776a.pdf [file c1ob06776a.pdf]
